# Supplementary material for: Estimated Burden of Stroke in China in 2020
Source: PubMed Central journal article supplement (PMC9982699; doi:10.1001/jamanetworkopen.2023.1455), 2023-03-02
Supplement: jamanetwopen-e231455-s001.pdf [file jamanetwopen-e231455-s001.pdf]

## Supplemental Online Content

Tu WJ, Zhao Z, Yin P, et al. Estimated burden of stroke in China in 2020. *JAMA Netw Open*. 2023;6(3):e231455. doi:10.1001/jamanetworkopen.2023.1455

**eAppendix 1.** Introduction of the Stroke Prevention and Control Project

**eAppendix 2.** Data Collection of Stroke Prevention and Control Project

**eAppendix 3.** English and Chinese Version of the Related Questions of the Stroke Prevention and Control Project in 2020

**eAppendix 4.** Stroke Base Hospitals Participating in the Screening

**eFigure 1.** Map of Study Sites Participated in the Cross-Sectional Survey

**eFigure 2.** Age-Standardized and Sex-Standardized Prevalence of Stroke Stratified by Provinces

**eFigure 3.** The Age-Standardized and Sex-Standardized Incidence of Stroke Stratified by Provinces

**eFigure 4.** The Age-Standardized and Sex-Standardized Mortality of Stroke Stratified by Provinces

**eTable 1.** Baseline Characteristics of All Participants Stratified by Locality in 2020

**eTable 2.** Respond Rate Calculator of the 2020 National Stroke High-Risk Population Screening Program According to American Association for Public Opinion Research (AAPOR)

**eTable 3.** Characteristics of the All Participants and Stroke Participants Stratified by Sex in 2020

**eTable 4.** Characteristics of the All Participants and Stroke Participants Stratified by Locality in 2020

**eTable 5.** Stroke Burden of Chinese Adults Aged 40 Years or Over by Sex in 2020

**eTable 6.** The Prevalence and Nonfatal Stroke Incidence in Chinese Adults Aged 40 Years or Older in 2020

**eTable 7.** Multivariable Adjusted Odds Ratios for Stroke

This supplemental material has been provided by the authors to give readers additional information about their work.

## **eAppendix 1. Introduction of the Stroke Prevention and Control Project**

### **Overview**

The stroke prevention and control project is an ongoing population-based project that enrolled community-dwelling adults aged  $\geq 40$  years each year from 31 provinces in mainland China. This project was initiated in 2011 and covered six provinces across the country. In 2012, it expanded to ten provinces across the country. Since 2013, it enrolled around 0.8 million participants, which covered about 0.15% of the target population across the country each year. The participating hospitals and study sites in each province were determined according to the economic development status, population size, and the basis of work. The stroke prevention and control project is organized and led by the General Office of Stroke Prevention Project Committee, National Health Commission of the People's Republic of China.

Participants were classified into high, medium, and low-risk groups according to the National Stroke Association's Stroke Risk Scorecard. Individuals who were identified as high risk were invited to examine cervical vascular ultrasound. The study recorded carotid intima thickening, plaque, stenosis, or occlusion for the high-risk participants. The high-risk participants, carotid stenosis, and individuals who had experienced stroke or transient ischemic attack were invited to conduct further laboratory tests, lifestyle interventions, and early clinical treatment. The study group followed up the high-risk participants every six months and the intermediate-risk group once a year.

### **Study sites**

The screening point system was established in 2011, covering 93 sites initially, expanding to 450 in 2020 to accommodate societal and economic development. One screening point covers a rural county or an urban district. The selection of the study sites considered the following factors: socioeconomic and environmental conditions, education level, medical care, and lifestyles.

## Sampling procedure

The study used a stratified two-stage cluster sampling design to ensure representativeness of the national population of mainland China.

In the first stage of sampling, all the cities in mainland China were stratified as developed, developing and undeveloped according to the gross domestic product per capita, concentration of commercial resources, the extent to which a city serves as a commercial hub, vitality of residents, diversity of lifestyle, and future growth potential of the city. The classification has been published elsewhere.<sup>1</sup> In the first stage of sampling, all the cities in mainland China were stratified as developed, developing and undeveloped according to the GDP per capita of the city. The study selected 16 out of 19 (84.2%) developed cities, 75 out of 99 (75.8%) developing cities and 89 out of 216 (41.2%) undeveloped cities as the primary sampling units (PSUs) using stratified sampling.

The second stage is to list all the communities or villages of the PSUs with at least 2,000 residents' age  $\geq 40$  years as the sampling frame, and randomly select one using random sampling method. All the eligible residents of the selected communities or villages were invited to the study. Eligibility criteria include: (1) community residents aged  $\geq 40$  years and resident at the selected area for at least 6 months and (2) provision of informed consent. All residents who agree to participate in the project will make an appointment of the face-to-face interviews at the project hospital for information collection and health check. The communities or villages with a response rate lower than 85% were dropped out of the study.

## Sample Size calculation

The sample size was calculated by the following formula:  $N = deff \frac{u^2 p(1-p)}{d^2}$

Where  $u = 1.96$  (corresponding to 95% confidence level),  $deff$  is design efficiency 5),  $r$  is relative error (20%), and  $d = r \times p$ .  $p$  is the prevalence of factor studied for calculation. The prevalence of

stroke (2%) obtained in the China National Stroke Screening Survey 2013 was used as a measure of probability (p); and the relative error was:  $d=r \times 2\%$ ,  $r=15\%$ . Based on these factors, the sample size for each stratum was estimated to be 41831 subjects. Because there were 10 strata, and assuming a potential response rate of 85%, the sample size of ages  $\geq 40$  years was calculated as 481057 ( $\approx 500000$  subjects).

## Sample weights

Across all stroke prevention and control project, we developed sample weights to account for multi-stage sampling design and post-stratification. For an individual in the sample, his/her sample weights were developed as follows.

### 1. Design weights for multi-stage design ( $W_{\text{design}}$ )

- Stratifications: East/ Central /West \* Urban/Rural = 6 strata
- $A1$ =Number of districts/counties in different stratum in the sample
- $B1$ =Number of districts/counties -level administrative districts in each stratum
- $W_{\text{design}}=B1/A1$ , assign the weight  $W_{\text{design}}$  of each stratum to the corresponding case of each stratum

### 2. Post-stratification weights ( $W_{\text{ps}}$ )

- Stratifications: gender (2 levels) \* geographic region (6 levels: North China, Northeast China, East China, Central South, Southwest, Northwest) \*age group (9 levels: 40-44, 45-49, 50-54, 55-59, 60-64, 65-69, 70-74, 75-79, 80+)=108 stratum
- $A2$ =The sum of the case weights  $W_{\text{design}}$  of each stratum of the sample
- $B2$ =Number of people by stratum in the 2010 Sixth census
- $W_{\text{ps}}=B2/A2$ , assign the weight  $W_{\text{ps}}$  of each stratum to the corresponding case of each stratum

### 3. Final weights ( $Fw$ )

- $Fw= W_{\text{design}} * W_{\text{ps}}$ , assign the weight ( $Fw$ ) to the corresponding case

Reference:

1. Li Y, Teng D, Shi X, et al. Prevalence of diabetes recorded in mainland China using 2018 diagnostic criteria from the American Diabetes Association: national cross sectional study. *BMJ*. 2020;369:m997. Published 2020 Apr 28. doi:10.1136/bmj.m997

## **eAppendix 2. Data Collection of Stroke Prevention and Control Project**

### **Overview**

Stroke prevention and control project field work was coordinated by the General Office of Stroke Prevention Project Committee and local CDCs and implemented by the local stroke base hospitals. All field work staff received mandatory training provided by certified instructors from the General Office of Stroke Prevention Project Committee and hosted by provincial CDCs.

From July 16 to December 31, 2020, trained interviewers (Brain Health Manager) from stroke base hospital visited each household and collected the informed consent forms and arranged a face-to-face interview and physical examination time. Basic information and medical history collection, physical measurement, biochemical sample collection and pre-treatment were arranged at the stroke base hospital or community hospital.

### **Outpatient information collection**

During the face-to-face interview, all eligible subjects were asked according to a structural questionnaire that covered demographic characteristics, vegetable or fruit intake(self-report), lifestyle factors, and history of chronic diseases. Participants with a history of stroke were evaluated the mRS score. Surgical or interventional treatment of vascular lesions needs to be collected. For participants with reduced mobility, all work was done by the interviewers at home.

### **Physical measurements**

All subjects were invited to attend a physical measurement. Weight, height, waist circumference, and blood pressure were measured using a standard protocol. The interviewing neurologists provide cardiac auscultation; cardiac auscultation with arrhythmias using an electrocardiogram (ECG). In this study, patients with atrial fibrillation included self-reported patients and patients with an arrhythmia

detected on-site screening and confirmed by ECG. Participants defined as high risk were invited to additional cervical vascular ultrasound. Carotid intima thickening, plaque, stenosis, or occlusion was recorded.

### **Blood sample testing**

Fasting serum samples were collected, and serum levels of glucose, homocysteine, triglycerides, cholesterol, high density lipoprotein, and low-density lipoprotein were tested by an HP-AFS/3 automatic immunoassay system A3 Specific Protein Analyzer with supporting reagents (Shijiazhuang Hebo Biotechnology Co., Ltd., Shijiazhuang, China). Samples testing was carried out at the screening point, and the test results were uploaded directly to the Bigdata Observatory platform for Stroke of China (BOSC, formerly known as the China Stroke Data Center data reporting platform).

### **Determination of the primary outcome**

- The diagnosis of stroke among the living subjects required the investigator to provide a diagnosis certificate and/or an imaging certificate (CT/MRI) from a secondary or higher medical unit (Level II and above hospitals). Stroke were classified as ischemic stroke [IS, ICD63], intracerebral hemorrhage [ICH, ICD61], subarachnoid hemorrhage [SAH, ICD60], and stroke of undetermined type. Individuals with suspected stroke were re-interviewed by trained neurologists.
- The diagnosis of stroke among those who died during the 12 months preceding the survey used the validated verbal autopsy technique, which obtained information from the members of the households to identify stroke as a possible cause of death. In addition, the study used the death certificate to validate the cause of death.
- At the second stage, Provincial Centre for Disease Control and Prevention and stroke base hospital organized neurologists to ascertain all study participants, including deceased ones, and identified with stroke or suspected stroke to confirm or refute the diagnosis.

- Living subjects with confirmed stroke at interview were considered to have prevalent stroke. The point-prevalence day was determined as December 31, 2020. First ever strokes (including patients who died from stroke) that occurred during 1 year preceding the survey point prevalent time were considered as incident cases.

### **Data management and quality assurance**

The collected information from the study sites were instructed to upload to the Bigdata Observatory platform for Stroke manually before February 28, 2021. The testing results were designed transmitted automatically. All information were reviewed by the specialized staff from General Office of Stroke Prevention Project Committee according to the standard procedure.

All brain health managers at the stroke base hospitals were trained using a standardized protocol and formally certified before taking part in the data collection. Each screening site had a professional quality controller to verify and monitor the quality and completeness of questionnaires and to ensure the adherence to the standardized study protocol. Within a few weeks of the initial baseline survey in a particular community (e.g. village), a quality control survey was done by the Provincial Center for Disease Control and Prevention, involving 2% of the participants randomly selected from that community with repeat questionnaires and measures on selected items. The quality and completeness of study in each survey site would be checked regularly during the study period by the General Office of Stroke Prevention Project Committee. The general office releases the quality control report every month, reporting on the number of people who have died and the number of newly diagnosed chronic diseases (such as stroke and cardiovascular diseases). On-site monitoring visits for ten project sites were also undertaken by general office to check the information of stroke patients and dead patients. The Clinical Research Organization supervise the whole process during the data collection and cleaning process. In 2020, two of the urban screening sites and three rural areas did not meet the requirements of the study design and were excluded from the final data analysis.



**eAppendix 3. English and Chinese Version of the Related Questions of the Stroke Prevention and Control Project in 2020**

|                             |                    | English version                                                                                                                                                                                                                                                                                                                                                                                                                                                                        | 中文版本  |                                                                                                                                                                                                                                                                                                  |
|-----------------------------|--------------------|----------------------------------------------------------------------------------------------------------------------------------------------------------------------------------------------------------------------------------------------------------------------------------------------------------------------------------------------------------------------------------------------------------------------------------------------------------------------------------------|-------|--------------------------------------------------------------------------------------------------------------------------------------------------------------------------------------------------------------------------------------------------------------------------------------------------|
| Code                        | Question           | Answer                                                                                                                                                                                                                                                                                                                                                                                                                                                                                 | 问题    | 回答/选项                                                                                                                                                                                                                                                                                            |
| <b>1. Basic Information</b> |                    |                                                                                                                                                                                                                                                                                                                                                                                                                                                                                        |       |                                                                                                                                                                                                                                                                                                  |
| 1.1                         | Name               |                                                                                                                                                                                                                                                                                                                                                                                                                                                                                        | 姓名    |                                                                                                                                                                                                                                                                                                  |
| 1.2                         | Gender             | <input type="radio"/> Male<br><input type="radio"/> Female                                                                                                                                                                                                                                                                                                                                                                                                                             | 性别    | <input type="radio"/> 男<br><input type="radio"/> 女                                                                                                                                                                                                                                               |
| 1.3                         | Nationality        |                                                                                                                                                                                                                                                                                                                                                                                                                                                                                        | 民族    |                                                                                                                                                                                                                                                                                                  |
| 1.4                         | ID                 |                                                                                                                                                                                                                                                                                                                                                                                                                                                                                        | 身份证号  |                                                                                                                                                                                                                                                                                                  |
| 1.5                         | Marital Status     | <input type="radio"/> Unmarried<br><input type="radio"/> Married<br><input type="radio"/> Widowed<br><input type="radio"/> Divorced<br><input type="radio"/> Others                                                                                                                                                                                                                                                                                                                    | 婚姻状况  | <input type="radio"/> 未婚<br><input type="radio"/> 已婚<br><input type="radio"/> 丧偶<br><input type="radio"/> 离婚<br><input type="radio"/> 其他                                                                                                                                                         |
| 1.6                         | Residential status | <input type="radio"/> Living alone<br><input type="radio"/> Living only with spouse<br><input type="radio"/> Living only with children<br><input type="radio"/> Living with spouse and children<br><input type="radio"/> Living with others (with other relatives or caregivers)<br><input type="radio"/> Nursing home<br><input type="radio"/> Others                                                                                                                                 | 居住状况  | <input type="radio"/> 单独居住<br><input type="radio"/> 只与配偶同住<br><input type="radio"/> 只与子女同住<br><input type="radio"/> 与配偶及子女同住<br><input type="radio"/> 与他人同住 (其他亲戚或照料者同住)<br><input type="radio"/> 养老院<br><input type="radio"/> 其他                                                                |
| 1.7                         | Education level    | <input type="radio"/> Primary school and below<br><input type="radio"/> Junior high school<br><input type="radio"/> Secondary school/high school<br><input type="radio"/> College/Undergraduate<br><input type="radio"/> Master's degree and above                                                                                                                                                                                                                                     | 受教育程度 | <input type="radio"/> 小学及以下<br><input type="radio"/> 初中<br><input type="radio"/> 中专/高中<br><input type="radio"/> 大专/大本<br><input type="radio"/> 硕士及以上                                                                                                                                             |
| 1.8                         | Retired            | <input type="radio"/> Yes<br><input type="radio"/> No                                                                                                                                                                                                                                                                                                                                                                                                                                  | 是否已退休 | <input type="radio"/> 是<br><input type="radio"/> 否                                                                                                                                                                                                                                               |
| 1.9                         | Occupation         | <input type="radio"/> Responsible persons of institutions<br><input type="radio"/> Technical personnel<br><input type="radio"/> Clerks and related personnel<br><input type="radio"/> Business and service personnel<br><input type="radio"/> The production personnel of agriculture, forestry, animal husbandry, fishery, water conservancy industry<br><input type="radio"/> Production, transportation equipment operators and related personnel<br><input type="radio"/> Soldiers | 职业    | <input type="radio"/> 国家机关、党群组织、企业、事业单位负责人<br><input type="radio"/> 专业技术人员<br><input type="radio"/> 办事人员和有关人员<br><input type="radio"/> 商业、服务业人员<br><input type="radio"/> 农、林、牧、渔、水利业生产人员<br><input type="radio"/> 生产、运输设备操作人员及有关人员<br><input type="radio"/> 军人<br><input type="radio"/> 不便分类的其他从 |

|                                             |                         | English version                                                                                                                                                                                                                                                                                                                                                                                                                                                     |          | 中文版本                                                                                                                                                                                                                                                                                        |
|---------------------------------------------|-------------------------|---------------------------------------------------------------------------------------------------------------------------------------------------------------------------------------------------------------------------------------------------------------------------------------------------------------------------------------------------------------------------------------------------------------------------------------------------------------------|----------|---------------------------------------------------------------------------------------------------------------------------------------------------------------------------------------------------------------------------------------------------------------------------------------------|
|                                             |                         | <input type="radio"/> Other practitioners who are inconvenient to classify                                                                                                                                                                                                                                                                                                                                                                                          |          | 业人员                                                                                                                                                                                                                                                                                         |
| 1.10                                        | Annual income           | <input type="radio"/> <5000 RMB<br><input type="radio"/> 5000-10000 RMB<br><input type="radio"/> 10000-20000 RMB<br><input type="radio"/> >20000 RMB                                                                                                                                                                                                                                                                                                                | 年收入      | <input type="radio"/> 5 千元以下<br><input type="radio"/> 5 千-1 万<br><input type="radio"/> 1 万-2 万<br><input type="radio"/> 2 万元以上                                                                                                                                                              |
| 1.11                                        | Medical payment methods | <input type="radio"/> Urban Employee Basic Medical Insurance<br><input type="radio"/> New Urban Resident Basic Medical Insurance<br><input type="radio"/> New Rural Cooperative Medical Care<br><input type="radio"/> Commercial medical insurance<br><input type="radio"/> Full public expense<br><input type="radio"/> Full self-paid<br><input type="radio"/> Other social insurance<br><input type="radio"/> Poverty assistance<br><input type="radio"/> Others | 主要医疗付费方式 | <input type="radio"/> 城镇职工基本医疗保险<br><input type="radio"/> 新城镇居民基本医疗保险<br><input type="radio"/> 新型农村合作医疗<br><input type="radio"/> 商业医疗保险<br><input type="radio"/> 全公费<br><input type="radio"/> 全自费<br><input type="radio"/> 其他社会保险<br><input type="radio"/> 贫困救助<br><input type="radio"/> 其他 |
| <b>2. Status at the time of this survey</b> |                         |                                                                                                                                                                                                                                                                                                                                                                                                                                                                     |          |                                                                                                                                                                                                                                                                                             |
| 2.1                                         | Death                   | <input type="radio"/> No<br><input type="radio"/> Yes (skip to 2.2)                                                                                                                                                                                                                                                                                                                                                                                                 | 是否死亡     | <input type="radio"/> 否<br><input type="radio"/> 是 (继续 2.2)                                                                                                                                                                                                                                 |
| 2.2.1                                       | Time of death           | <input type="radio"/> Before December 31, 2018 (inclusive)<br><input type="radio"/> Between January 1, 2019 and December 31, 2019<br><input type="radio"/> After January 1, 2020: January 2020.                                                                                                                                                                                                                                                                     | 死亡时间     | <input type="radio"/> 2018 年 12 月 31 日 (含当日) 以前<br><input type="radio"/> 2019 年 1 月 1 日至 2019 年 12 月 31 日之间<br><input type="radio"/> 2020 年 1 月 1 日之后: 2020 年 月 日。                                                                                                                          |
| 2.2.2                                       | Cause of Death          | <input type="radio"/> Stroke ( <input type="radio"/> Hemorrhagic Stroke<br><input type="radio"/> Ischemic Stroke <input type="radio"/> Unknown)<br>(skip to 2.2.3)<br><input type="radio"/> Coronary heart disease<br><input type="radio"/> Malignant tumors<br><input type="radio"/> Respiratory system diseases<br><input type="radio"/> Liver and kidney diseases - non-tumor<br><input type="radio"/> Accidents                                                 | 死亡原因     | <input type="radio"/> 脑卒中 ( <input type="radio"/> 出血性脑卒中 <input type="radio"/> 缺血性脑卒中<br><input type="radio"/> 不详) (继续 2.2.3)<br><input type="radio"/> 冠心病<br><input type="radio"/> 恶性肿瘤<br><input type="radio"/> 呼吸系统疾病<br><input type="radio"/> 肝肾疾病-非肿瘤<br><input type="radio"/> 意外      |
| 2.2.3                                       | Place of death          | <input type="radio"/> In the hospital (skip to 2.2.4)<br><input type="radio"/> Outside the hospital                                                                                                                                                                                                                                                                                                                                                                 | 死亡地点     | <input type="radio"/> 院内(继续 2.2.4)<br><input type="radio"/> 院外                                                                                                                                                                                                                              |
| 2.2.4                                       | Hospital level          | <input type="radio"/> Provincial hospital<br><input type="radio"/> Prefecture-level hospital<br><input type="radio"/> County-level hospital<br><input type="radio"/> Community or township health institution                                                                                                                                                                                                                                                       | 医院级别     | <input type="radio"/> 省级医院<br><input type="radio"/> 地市级医院<br><input type="radio"/> 县级医院<br><input type="radio"/> 社区或乡镇卫生机构                                                                                                                                                                  |

|                          |                        | English version                                                                                                                                                                                                                                                                                                                                                                                                                                                                                                                                              | 中文版本 |                                                                                                                                                                                                                                                                                                                                                                                                                          |
|--------------------------|------------------------|--------------------------------------------------------------------------------------------------------------------------------------------------------------------------------------------------------------------------------------------------------------------------------------------------------------------------------------------------------------------------------------------------------------------------------------------------------------------------------------------------------------------------------------------------------------|------|--------------------------------------------------------------------------------------------------------------------------------------------------------------------------------------------------------------------------------------------------------------------------------------------------------------------------------------------------------------------------------------------------------------------------|
|                          | Diagnosis of admission | <input type="radio"/> Ischemic stroke<br><input type="radio"/> Cerebral hemorrhage<br><input type="radio"/> Subarachnoid hemorrhage<br><input type="radio"/> Transient ischemic attack (TIA)                                                                                                                                                                                                                                                                                                                                                                 | 入院诊断 | <input type="radio"/> 脑梗死<br><input type="radio"/> 脑出血<br><input type="radio"/> 蛛网膜下腔出血<br><input type="radio"/> 短暂性脑缺血发作 (TIA)                                                                                                                                                                                                                                                                                          |
|                          | Hospital records       | <input type="radio"/> YES<br><input type="radio"/> NO                                                                                                                                                                                                                                                                                                                                                                                                                                                                                                        | 住院病历 | <input type="radio"/> 提供<br><input type="radio"/> 没有提供                                                                                                                                                                                                                                                                                                                                                                   |
| <b>3. Lifestyle</b>      |                        |                                                                                                                                                                                                                                                                                                                                                                                                                                                                                                                                                              |      |                                                                                                                                                                                                                                                                                                                                                                                                                          |
| 3.1                      | Smoking                | <input type="radio"/> No<br><input type="radio"/> Yes<br>if you are smoking, the number of years of smoking is ____, and the number per day is ____<br>If you have quit smoking, quit smoking for years is ____; have smoked for years is ____。                                                                                                                                                                                                                                                                                                              | 吸烟   | <input type="radio"/> 否<br><input type="radio"/> 是<br>若正在吸烟, 吸烟年限 ____ 年, 每天 ____ 支;<br>若已戒烟, 戒烟年限 ____ 年, 曾经吸烟 ____ 年                                                                                                                                                                                                                                                                                                   |
| 3.2                      | Drinking alcohol       | <input type="radio"/> Do not drink alcohol<br><input type="radio"/> Light drinking<br><input type="radio"/> Frequent heavy drinking (white wine $\geq 3$ times/week, $\geq 100g$ each time)                                                                                                                                                                                                                                                                                                                                                                  | 饮酒   | <input type="radio"/> 不饮酒<br><input type="radio"/> 少量饮酒<br><input type="radio"/> 经常大量饮酒 (白酒 $\geq 3$ 次/周, 每次 $\geq 2$ 两)                                                                                                                                                                                                                                                                                                 |
| 3.3                      | Exercise habits        | <input type="radio"/> Regular exercise (moderate-intensity exercise equivalent to brisk walking, $\geq 3$ times a week, $\geq 30$ minutes each time, including moderate and heavy physical workers)<br><input type="radio"/> Lack of exercise (those who do not meet the above criteria for regular exercise)                                                                                                                                                                                                                                                | 运动习惯 | <input type="radio"/> 经常运动 (相当于快步走的中等强度运动, 且每周 $\geq 3$ 次、每次 $\geq 30$ 分钟, 包含中度、重度体力劳动者)<br><input type="radio"/> 缺乏运动 (不符合上述经常运动标准者)                                                                                                                                                                                                                                                                                    |
| 3.4                      | Dietary habits         | Taste: <input type="radio"/> Salty <input type="radio"/> Light <input type="radio"/> Moderate<br>Meat and vegetarian: <input type="radio"/> partial meat <input type="radio"/> partial vegetarian <input type="radio"/> balanced<br>Vegetables (300g of vegetables per day): <input type="radio"/> $\geq 5$ days/week <input type="radio"/> 3-4 days/week <input type="radio"/> $\leq 2$ days/week<br>Fruits (200g of fruits per day): <input type="radio"/> $\geq 5$ days/week <input type="radio"/> 3-4 days/week <input type="radio"/> $\leq 2$ days/week | 膳食习惯 | 口味: <input type="radio"/> 偏咸 <input type="radio"/> 偏淡 <input type="radio"/> 适中<br>荤素: <input type="radio"/> 偏荤 <input type="radio"/> 偏素 <input type="radio"/> 均衡<br>吃蔬菜 (每日食用 6 两蔬菜):<br><input type="radio"/> $\geq 5$ 天/周 <input type="radio"/> 3-4 天/周 <input type="radio"/> $\leq 2$ 天/周<br>吃水果 (每日食用 4 两水果):<br><input type="radio"/> $\geq 5$ 天/周 <input type="radio"/> 3-4 天/周 <input type="radio"/> $\leq 2$ 天/周 |
| <b>4. Family history</b> |                        |                                                                                                                                                                                                                                                                                                                                                                                                                                                                                                                                                              |      |                                                                                                                                                                                                                                                                                                                                                                                                                          |
| 4.1                      | Stroke                 | <input type="radio"/> None<br><input type="radio"/> Yes, relationship with me: <input type="checkbox"/> Father                                                                                                                                                                                                                                                                                                                                                                                                                                               | 脑卒中  | <input type="radio"/> 无<br><input type="radio"/> 有, 与本人关系: <input type="checkbox"/> 父                                                                                                                                                                                                                                                                                                                                    |

|                                            |                                    | English version                                                                                                                                                                                                                                                                                                                                                                                                                                                                                                                                                                                                                                                                                                        | 中文版本   |                                                                                                                                                                                                                                                                                                                                                                                                  |
|--------------------------------------------|------------------------------------|------------------------------------------------------------------------------------------------------------------------------------------------------------------------------------------------------------------------------------------------------------------------------------------------------------------------------------------------------------------------------------------------------------------------------------------------------------------------------------------------------------------------------------------------------------------------------------------------------------------------------------------------------------------------------------------------------------------------|--------|--------------------------------------------------------------------------------------------------------------------------------------------------------------------------------------------------------------------------------------------------------------------------------------------------------------------------------------------------------------------------------------------------|
|                                            |                                    | <input type="checkbox"/> Mother <input type="checkbox"/> Siblings (How many _____)<br><input type="radio"/> Unknown                                                                                                                                                                                                                                                                                                                                                                                                                                                                                                                                                                                                    |        | 亲 <input type="checkbox"/> 母亲 <input type="checkbox"/> 兄弟姐妹 (患病 人)<br><input type="radio"/> 不详                                                                                                                                                                                                                                                                                                   |
| 4.2                                        | Coronary heart disease             | <input type="radio"/> None<br><input type="radio"/> Yes, relationship with me: <input type="checkbox"/> Father <input type="checkbox"/> Mother <input type="checkbox"/> Siblings (How many _____)<br><input type="radio"/> Unknown                                                                                                                                                                                                                                                                                                                                                                                                                                                                                     | 冠心病    | <input type="radio"/> 无<br><input type="radio"/> 有, 与本人关系: <input type="checkbox"/> 父亲 <input type="checkbox"/> 母亲 <input type="checkbox"/> 兄弟姐妹 (患病 人)<br><input type="radio"/> 不详                                                                                                                                                                                                              |
| 4.3                                        | Hypertension                       | <input type="radio"/> None<br><input type="radio"/> Yes, relationship with me: <input type="checkbox"/> Father <input type="checkbox"/> Mother <input type="checkbox"/> Siblings (How many _____)<br><input type="radio"/> Unknown                                                                                                                                                                                                                                                                                                                                                                                                                                                                                     | 高血压    | <input type="radio"/> 无<br><input type="radio"/> 有, 与本人关系: <input type="checkbox"/> 父亲 <input type="checkbox"/> 母亲 <input type="checkbox"/> 兄弟姐妹 (患病 人)<br><input type="radio"/> 不详                                                                                                                                                                                                              |
| 4.4                                        | Diabetes                           | <input type="radio"/> None<br><input type="radio"/> Yes, relationship with me: <input type="checkbox"/> Father <input type="checkbox"/> Mother <input type="checkbox"/> Siblings (How many _____)<br><input type="radio"/> Unknown                                                                                                                                                                                                                                                                                                                                                                                                                                                                                     | 糖尿病    | <input type="radio"/> 无<br><input type="radio"/> 有, 与本人关系: <input type="checkbox"/> 父亲 <input type="checkbox"/> 母亲 <input type="checkbox"/> 兄弟姐妹 (患病 人)<br><input type="radio"/> 不详                                                                                                                                                                                                              |
| <b>5. Past medical history and control</b> |                                    |                                                                                                                                                                                                                                                                                                                                                                                                                                                                                                                                                                                                                                                                                                                        |        |                                                                                                                                                                                                                                                                                                                                                                                                  |
| 5.1                                        | History of cerebrovascular disease | <input type="radio"/> NO<br><input type="radio"/> YES (Skip to 5.1.1-5.1.4)                                                                                                                                                                                                                                                                                                                                                                                                                                                                                                                                                                                                                                            | 脑血管病史  | <input type="radio"/> 无<br><input type="radio"/> 有 (继续 5.1.1-5.1.4)                                                                                                                                                                                                                                                                                                                              |
| 5.1.1                                      | Types of cerebrovascular disease   | <input type="checkbox"/> Ischemic stroke<br><input type="checkbox"/> Cerebral hemorrhage<br><input type="checkbox"/> Subarachnoid hemorrhage<br><input type="checkbox"/> Transient ischemic attack (TIA)                                                                                                                                                                                                                                                                                                                                                                                                                                                                                                               | 脑血管病类型 | <input type="checkbox"/> 脑梗死<br><input type="checkbox"/> 脑出血<br><input type="checkbox"/> 蛛网膜下腔出血 <input type="checkbox"/> 短暂性脑缺血发作 (TIA)                                                                                                                                                                                                                                                         |
| 5.1.2                                      | First onset                        | Time of first onset: _____ years _____ months<br>Level of medical institutions:<br><input type="radio"/> Provincial hospitals<br><input type="radio"/> Prefecture-level hospitals<br><input type="radio"/> County-level hospitals<br><input type="radio"/> Community or township health institutions<br>Main diagnosis:<br><input type="radio"/> Ischemic stroke<br><input type="radio"/> Cerebral hemorrhage<br><input type="radio"/> Subarachnoid hemorrhage<br><input type="radio"/> Transient ischemic attack (TIA)<br>Rehabilitation during hospitalization:<br><input type="radio"/> No<br><input type="radio"/> Yes<br>Rehabilitation after discharge:<br><input type="radio"/> No<br><input type="radio"/> Yes | 首次发病   | 首次发病时间: _____ 年 _____ 月<br>就诊机构级别:<br><input type="radio"/> 省级医院<br><input type="radio"/> 地市级医院<br><input type="radio"/> 县级医院<br><input type="radio"/> 社区或乡镇卫生机构<br>主要诊断:<br><input type="radio"/> 脑梗死<br><input type="radio"/> 脑出血<br><input type="radio"/> 蛛网膜下腔出血<br><input type="radio"/> 短暂性脑缺血发作 (TIA)<br>住院期间是否接受康复治疗:<br><input type="radio"/> 否<br><input type="radio"/> 是<br>出院后是否接受康复 |

|       |                   | English version                                                                                                                                                                                                                                                                                                                                                                                                                                                                                                                                                                                                                                                                                                                                                                                                             | 中文版本       |                                                                                                                                                                                                                                                                                                                                                                                                                                                                                                                              |
|-------|-------------------|-----------------------------------------------------------------------------------------------------------------------------------------------------------------------------------------------------------------------------------------------------------------------------------------------------------------------------------------------------------------------------------------------------------------------------------------------------------------------------------------------------------------------------------------------------------------------------------------------------------------------------------------------------------------------------------------------------------------------------------------------------------------------------------------------------------------------------|------------|------------------------------------------------------------------------------------------------------------------------------------------------------------------------------------------------------------------------------------------------------------------------------------------------------------------------------------------------------------------------------------------------------------------------------------------------------------------------------------------------------------------------------|
|       |                   | Medical record materials:<br><input type="radio"/> Provided<br><input type="radio"/> Not provided                                                                                                                                                                                                                                                                                                                                                                                                                                                                                                                                                                                                                                                                                                                           |            | 治疗:<br><input type="radio"/> 否<br><input type="radio"/> 是<br>病历材料:<br><input type="radio"/> 提供<br><input type="radio"/> 不提供                                                                                                                                                                                                                                                                                                                                                                                                  |
| 5.1.3 | Last onset        | Time of last onset: _____<br>years_____months<br>Level of medical institutions:<br><input type="radio"/> Provincial hospitals<br><input type="radio"/> Prefecture-level hospitals<br><input type="radio"/> County-level hospitals<br><input type="radio"/> Community or township health institutions<br>Main diagnosis:<br><input type="radio"/> Ischemic stroke<br><input type="radio"/> Cerebral hemorrhage<br><input type="radio"/> Subarachnoid hemorrhage<br><input type="radio"/> Transient ischemic attack (TIA)<br>Rehabilitation during hospitalization:<br><input type="radio"/> No<br><input type="radio"/> Yes<br>Rehabilitation after discharge:<br><input type="radio"/> No<br><input type="radio"/> Yes<br>Medical record materials:<br><input type="radio"/> Provided<br><input type="radio"/> Not provided | 最后一次发病     | 末次发病时间: _____<br>年_____月<br>就诊机构级别:<br><input type="radio"/> 省级医院<br><input type="radio"/> 地市级医院<br><input type="radio"/> 县级医院<br><input type="radio"/> 社区或乡镇卫生机构<br>主要诊断:<br><input type="radio"/> 脑梗死<br><input type="radio"/> 脑出血<br><input type="radio"/> 蛛网膜下腔出血<br><input type="radio"/> 短暂性脑缺血发作 (TIA)<br>住院期间是否接受康复治疗:<br><input type="radio"/> 否<br><input type="radio"/> 是<br>出院后是否接受康复治疗:<br><input type="radio"/> 否<br><input type="radio"/> 是<br>病历材料:<br><input type="radio"/> 提供<br><input type="radio"/> 不提供 |
| 5.1.4 | mRS at the survey | <input type="radio"/> Completely asymptomatic-0<br><input type="radio"/> Although there are symptoms, but there is no obvious functional impairment, can complete all daily work and life-1<br><input type="radio"/> Mild disability, unable to complete all activities before the illness, but can take care of their daily life without assistance-2<br><input type="radio"/> Moderately disabled, requires partial assistance, but can walk independently-3<br><input type="radio"/> Severely disabled, unable to walk independently, unable to meet their                                                                                                                                                                                                                                                               | 调查时 mRS 评分 | <input type="radio"/> 完全无症状-0<br><input type="radio"/> 尽管有症状, 但无明显功能障碍, 能完成所有日常工作和生活 -1<br><input type="radio"/> 轻度残疾, 不能完成病前所有活动, 但不需帮助能照顾自己的日常生活-2<br><input type="radio"/> 中度残疾, 需部分帮助, 但能独立行走-3<br><input type="radio"/> 重度残疾, 不能独立行走, 无他人帮助不能满足自身日常生活需求-4                                                                                                                                                                                                                                                               |

|       |                                           | English version                                                                                                                                                                                                                                                                                                                                                                                                                    |         | 中文版本                                                                                                                                                                                                                                                                                 |
|-------|-------------------------------------------|------------------------------------------------------------------------------------------------------------------------------------------------------------------------------------------------------------------------------------------------------------------------------------------------------------------------------------------------------------------------------------------------------------------------------------|---------|--------------------------------------------------------------------------------------------------------------------------------------------------------------------------------------------------------------------------------------------------------------------------------------|
|       |                                           | daily needs without the help of others-4<br>○ Severe disability, continuous bedridden, fecal incontinence, requiring continuous care and attention, and dependence on others in daily life-5                                                                                                                                                                                                                                       |         | ○严重残疾，持续卧床、二便失禁，需持续护理和关注，日常生活完全依赖他人-5                                                                                                                                                                                                                                                |
| 5.2   | History of heart disease                  | ○ NO<br>○ YES (Skip to 5.2.1-5.2.5)                                                                                                                                                                                                                                                                                                                                                                                                | 心脏病史    | ○ 否<br>○ 是 (继续 5.2.1-5.2.5)                                                                                                                                                                                                                                                          |
| 5.2.1 | Type of heart disease                     | <input type="checkbox"/> Coronary heart disease ( <input type="checkbox"/> angina pectoris, <input type="checkbox"/> myocardial infarction, <input type="checkbox"/> asymptomatic coronary stenosis)<br><input type="checkbox"/> Atrial fibrillation (o paroxysmal, o persistent, o unknown)<br><input type="checkbox"/> Valvular heart disease<br><input type="checkbox"/> Other ( )<br><input type="checkbox"/> specific unknown | 心脏病类型   | <input type="checkbox"/> 冠心病 ( <input type="checkbox"/> 心绞痛、 <input type="checkbox"/> 心肌梗死、 <input type="checkbox"/> 无症状冠脉狭窄)<br><input type="checkbox"/> 房颤 (○阵发型, ○持续性 ○未知)<br><input type="checkbox"/> 瓣膜性心脏病<br><input type="checkbox"/> 其他 ( )<br><input type="checkbox"/> 具体不详 |
| 5.2.2 | The number of occurrences:                |                                                                                                                                                                                                                                                                                                                                                                                                                                    | 发病次数    |                                                                                                                                                                                                                                                                                      |
| 5.2.3 | First diagnosis of coronary heart disease | Time of diagnosis: _____years____months<br>Level of medical institutions:<br>○Provincial hospitals<br>○Prefecture-level hospitals<br>○County-level hospitals<br>○ Community or township health institutions                                                                                                                                                                                                                        | 冠心病首次确诊 | 确诊时间: _____年____月<br>就诊机构级别:<br>○省级医院<br>○地市级医院<br>○县级医院<br>○社区或乡镇卫生机构                                                                                                                                                                                                               |
| 5.2.4 | Last diagnosis of coronary heart disease  | Time of diagnosis: _____years____months<br>Level of medical institutions:<br>○Provincial hospitals<br>○Prefecture-level hospitals<br>○County-level hospitals<br>○ Community or township health institutions                                                                                                                                                                                                                        | 冠心病末次确诊 | 确诊时间: _____年____月<br>就诊机构级别:<br>○省级医院<br>○地市级医院<br>○县级医院<br>○社区或乡镇卫生机构                                                                                                                                                                                                               |
| 5.2.5 | Atrial fibrillation                       | Time of diagnosis: _____years____months<br>Take antithrombotic drugs:<br>○ No<br>○ YES<br>Drug varieties:<br><input type="checkbox"/> warfarin<br><input type="checkbox"/> new anticoagulant<br><input type="checkbox"/> aspirin                                                                                                                                                                                                   | 房颤      | 确诊时间: _____年____月<br>抗血栓药物:<br>○ 否<br>○ 是<br>用药品种:<br><input type="checkbox"/> 华法林<br><input type="checkbox"/> 新型抗凝剂<br><input type="checkbox"/> 阿司匹林                                                                                                                                |

|       | English version            |                                                                                                                                                                                                                                                                                                                                                                                                                                                                                                                                                                                                                                                                                                                                                                                                                                                                                                            | 中文版本  |                                                                                                                                                                                                                                                                                                                                                                                                                                                                                                                                                                                                                                                    |
|-------|----------------------------|------------------------------------------------------------------------------------------------------------------------------------------------------------------------------------------------------------------------------------------------------------------------------------------------------------------------------------------------------------------------------------------------------------------------------------------------------------------------------------------------------------------------------------------------------------------------------------------------------------------------------------------------------------------------------------------------------------------------------------------------------------------------------------------------------------------------------------------------------------------------------------------------------------|-------|----------------------------------------------------------------------------------------------------------------------------------------------------------------------------------------------------------------------------------------------------------------------------------------------------------------------------------------------------------------------------------------------------------------------------------------------------------------------------------------------------------------------------------------------------------------------------------------------------------------------------------------------------|
|       |                            | <input type="checkbox"/> clopidogrel<br><input type="checkbox"/> other<br>Years of medication: _____ Years,<br>Medication situation: <input type="radio"/> Regular <input type="radio"/> Irregular                                                                                                                                                                                                                                                                                                                                                                                                                                                                                                                                                                                                                                                                                                         |       | <input type="checkbox"/> 氯吡格雷<br><input type="checkbox"/> 其他<br>用药年限: 年,<br>用药情况: <input type="radio"/> 规律 <input type="radio"/> 不规律                                                                                                                                                                                                                                                                                                                                                                                                                                                                                                               |
| 5.3   | Hypertension               |                                                                                                                                                                                                                                                                                                                                                                                                                                                                                                                                                                                                                                                                                                                                                                                                                                                                                                            | 高血压   |                                                                                                                                                                                                                                                                                                                                                                                                                                                                                                                                                                                                                                                    |
| 5.3.1 | Blood pressure measurement | Frequency of measurement during this survey: <input type="radio"/> Never measured<br><input type="radio"/> Frequent (at least once/week)<br><input type="radio"/> Occasional measurement<br>Measure blood pressure at home:<br><input type="radio"/> No<br><input type="radio"/> Occasional<br><input type="radio"/> Frequent: _____ frequency: _____ times/week                                                                                                                                                                                                                                                                                                                                                                                                                                                                                                                                           | 血压测量  | 本次调查期间血压测量频率:<br><input type="radio"/> 从未测量<br><input type="radio"/> 经常测量 (每周至少1次)<br><input type="radio"/> 偶尔测量<br>是否家庭自测血压:<br><input type="radio"/> 否<br><input type="radio"/> 偶尔测量<br><input type="radio"/> 经常测量: 测量频率: _____ 次/周                                                                                                                                                                                                                                                                                                                                                                                                              |
| 5.3.2 | Diagnosis and Treatment    | Diagnosed with hypertension in the past:<br><input type="radio"/> None<br><input type="radio"/> Yes, time of diagnosis: □□□□ years<br>Take antihypertensive drugs:<br><input type="radio"/> No<br><input type="radio"/> Yes<br>Types of medication:<br><input type="checkbox"/> oral diuretics<br><input type="checkbox"/> oral calcium antagonists<br><input type="checkbox"/> oral beta-blockers<br><input type="checkbox"/> oral alpha-blockers<br><input type="checkbox"/> Oral Alpha, Beta Blockers<br><input type="checkbox"/> Oral ACEI<br><input type="checkbox"/> Oral ARB<br><input type="checkbox"/> Others<br>Years of medication: _____ years,<br>Medication situation:<br><input type="radio"/> Regular<br><input type="radio"/> Irregular<br>Blood pressure control:<br><input type="radio"/> Meet the target<br><input type="radio"/> Not meet the target<br><input type="radio"/> Unclear | 诊断和治疗 | 既往有无被诊断为高血压:<br><input type="radio"/> 无<br><input type="radio"/> 有, 确诊时间: □□□□ 年<br>是否服用降压药:<br><input type="radio"/> 否<br><input type="radio"/> 是<br>用药种类:<br><input type="checkbox"/> 利尿药<br><input type="checkbox"/> 钙拮抗剂<br><input type="checkbox"/> $\beta$ 受体阻滞剂<br><input type="checkbox"/> $\alpha$ 受体阻滞剂<br><input type="checkbox"/> $\alpha, \beta$ 受体阻滞剂<br><input type="checkbox"/> ACEI<br><input type="checkbox"/> ARB<br><input type="checkbox"/> 其他<br>用药年限: 年,<br>用药情况:<br><input type="radio"/> 规律<br><input type="radio"/> 不规律<br>血压控制情况:<br><input type="radio"/> 达标<br><input type="radio"/> 不达标<br><input type="radio"/> 不清楚 |
| 5.4   | Dyslipidemia               |                                                                                                                                                                                                                                                                                                                                                                                                                                                                                                                                                                                                                                                                                                                                                                                                                                                                                                            | 血脂异常  |                                                                                                                                                                                                                                                                                                                                                                                                                                                                                                                                                                                                                                                    |
| 5.4.1 | Blood lipid measurement    | Frequency of blood lipid measurement:                                                                                                                                                                                                                                                                                                                                                                                                                                                                                                                                                                                                                                                                                                                                                                                                                                                                      | 血脂测量  | 频率:<br><input type="radio"/> 从未检测                                                                                                                                                                                                                                                                                                                                                                                                                                                                                                                                                                                                                  |

|                         |                           | English version                                                                                                                                                                                                                                                                                                                                                                                                                                                                                                                                                                | 中文版本  |                                                                                                                                                                                                                                                                                                                                                                                                                                |
|-------------------------|---------------------------|--------------------------------------------------------------------------------------------------------------------------------------------------------------------------------------------------------------------------------------------------------------------------------------------------------------------------------------------------------------------------------------------------------------------------------------------------------------------------------------------------------------------------------------------------------------------------------|-------|--------------------------------------------------------------------------------------------------------------------------------------------------------------------------------------------------------------------------------------------------------------------------------------------------------------------------------------------------------------------------------------------------------------------------------|
|                         |                           | <input type="radio"/> Never test<br><input type="radio"/> Regular test<br><input type="radio"/> Occasional test (less than 1 test per year)                                                                                                                                                                                                                                                                                                                                                                                                                                    |       | <input type="radio"/> 定期检测<br><input type="radio"/> 偶尔检测 (每年检测 < 1 次)                                                                                                                                                                                                                                                                                                                                                          |
|                         | Diagnosis and Treatment   | Previously diagnosed with dyslipidemia:<br><input type="radio"/> None<br><input type="radio"/> Yes, time of diagnosis: □□□□ years<br>Types of dyslipidemia:<br><input type="checkbox"/> High cholesterol<br><input type="checkbox"/> High triglycerides<br><input type="checkbox"/> High LDL-C<br><input type="checkbox"/> Low HDL-C<br><input type="checkbox"/> Unknown<br>Whether to take lipid-lowering drugs:<br><input type="radio"/> No<br><input type="radio"/> Yes: <input type="checkbox"/> Statins <input type="checkbox"/> Fibrates <input type="checkbox"/> Others | 诊断和治疗 | 既往有无被诊断为血脂异常<br><input type="radio"/> 无<br><input type="radio"/> 有, 确诊时间: □□□□ 年<br>血脂异常类型:<br><input type="checkbox"/> 高胆固醇<br><input type="checkbox"/> 高甘油三酯<br><input type="checkbox"/> 高 LDL-C<br><input type="checkbox"/> 低 HDL-C<br><input type="checkbox"/> 不详<br>是否服用调脂药:<br><input type="radio"/> 否<br><input type="radio"/> 是: <input type="checkbox"/> 他汀类 <input type="checkbox"/> 贝特类 <input type="checkbox"/> 其他 |
| 5.5                     | Diabetes                  |                                                                                                                                                                                                                                                                                                                                                                                                                                                                                                                                                                                | 糖尿病   |                                                                                                                                                                                                                                                                                                                                                                                                                                |
| 5.4.1                   | Blood glucose measurement | Frequency of blood glucose measurement:<br><input type="radio"/> Never test<br><input type="radio"/> Regular test<br><input type="radio"/> Occasional test (less than 1 test per year)                                                                                                                                                                                                                                                                                                                                                                                         | 血糖测量  | 频率:<br><input type="radio"/> 从未检测<br><input type="radio"/> 定期检测<br><input type="radio"/> 偶尔检测 (每年检测 < 1 次)                                                                                                                                                                                                                                                                                                                     |
|                         | Diagnosis and Treatment   | Previously diagnosed with Diabetes:<br><input type="radio"/> None<br><input type="radio"/> Yes, time of diagnosis: □□□□ years<br>Whether to use hypoglycemic drugs:<br><input type="radio"/> No<br><input type="radio"/> Yes:<br><input type="checkbox"/> Taking hypoglycemic drugs<br><input type="checkbox"/> Insulin<br><input type="checkbox"/> Others<br>Blood sugar control:<br><input type="radio"/> Basically reach the target<br><input type="radio"/> Unreachable<br><input type="radio"/> Unclear                                                                   | 诊断和治疗 | 既往有无被诊断为糖尿病<br><input type="radio"/> 无<br><input type="radio"/> 有, 确诊时间: □□□□ 年<br>是否应用降糖药:<br><input type="radio"/> 否<br><input type="radio"/> 是:<br><input type="checkbox"/> 服降糖药<br><input type="checkbox"/> 胰岛素<br><input type="checkbox"/> 其他<br>血糖控制情况<br><input type="radio"/> 基本达标<br><input type="radio"/> 未达标<br><input type="radio"/> 不清楚                                                                           |
| 6. Physical examination |                           |                                                                                                                                                                                                                                                                                                                                                                                                                                                                                                                                                                                |       |                                                                                                                                                                                                                                                                                                                                                                                                                                |
| 6.1                     | General signs             | Height: ___ cm<br>Weight: ___ kg<br>BMI (auto-generated): _____(kg/m2)                                                                                                                                                                                                                                                                                                                                                                                                                                                                                                         | 一般体征  | 身高: ___ cm<br>体重: ___ kg<br>BMI: (自动生成):                                                                                                                                                                                                                                                                                                                                                                                       |



|                           |                                                                                      | English version                                                                                                                                                                                                                                                                                                            | 中文版本                |                                                                                                                                                                                               |
|---------------------------|--------------------------------------------------------------------------------------|----------------------------------------------------------------------------------------------------------------------------------------------------------------------------------------------------------------------------------------------------------------------------------------------------------------------------|---------------------|-----------------------------------------------------------------------------------------------------------------------------------------------------------------------------------------------|
|                           |                                                                                      | Waist: cm                                                                                                                                                                                                                                                                                                                  |                     | ____(kg/m2) 腰围：<br>____cm                                                                                                                                                                     |
| 6.2                       | Blood pressure measurement (on the same side, need to measure twice)                 | First time:<br>Systolic blood pressure: __mmHg<br>Diastolic blood pressure: __mmHg,<br>Pulse: __beats/min<br>Second time,<br>Systolic blood pressure: __mmHg<br>Diastolic blood pressure: __mmHg,<br>pulse: __beats/min                                                                                                    | 现测血压(同侧, 需测量 2 次)   | 第一次:<br>收缩压: __mmHg<br>舒张压: __mmHg<br>脉搏: __次/分<br>第二次:<br>收缩压: __mmHg<br>舒张压__mmHg<br>脉搏: __次/分                                                                                              |
| 6.3                       | Cardiac auscultation                                                                 | Heart murmur:<br><input type="radio"/> None<br><input type="radio"/> Yes<br>Heart rhythm:<br><input type="radio"/> Regular<br><input type="radio"/> Irregular                                                                                                                                                              | 心脏听诊                | 心脏杂音:<br><input type="radio"/> 无<br><input type="radio"/> 有<br>心律:<br><input type="radio"/> 整齐<br><input type="radio"/> 不齐                                                                    |
| 6.4                       | Electrocardiogram (a must-do item for those with arrhythmia on cardiac auscultation) | Check result:<br><input type="radio"/> normal<br><input type="radio"/> Abnormal,<br>Abnormal type:<br><input type="radio"/> Atrial fibrillation<br><input type="radio"/> Other types                                                                                                                                       | 心电图: 心脏听诊有心律不齐者必做项目 | 检查结果:<br><input type="radio"/> 正常<br><input type="radio"/> 异常<br>异常类型:<br><input type="radio"/> 房颤<br><input type="radio"/> 其他类型                                                              |
| 7. Laboratory examination |                                                                                      |                                                                                                                                                                                                                                                                                                                            |                     |                                                                                                                                                                                               |
| 7.1                       | Blood glucose                                                                        | <input type="radio"/> Testing time :<br>____Year__month__day,<br>fasting blood glucose: __mmol/L<br><input type="radio"/> Testing time :<br>____Year__month__day,<br>2 hours postprandial blood glucose (recommended): __mmol/L<br><input type="radio"/> Testing time :<br>____Year__month__day,<br>Glycated hemoglobin__% | 血糖                  | <input type="radio"/> 检查时间: ____年__月__日,<br>空腹血糖: __mmol/L<br><input type="radio"/> 检查时间: ____年__月__日,,<br>餐后 2 小时血糖 (推荐): __mmol/L<br><input type="radio"/> 检查时间: ____年__月__日,,<br>糖化血红蛋白__% |
| 7.2                       | Blood lipids                                                                         | Testing time :<br>____Year__month__day<br>Triglycerides: ____mmol/L,<br>Cholesterol: ____mmol/L,<br>LDL cholesterol: ____mmol/L,<br>HDL cholesterol: ____mmol/L                                                                                                                                                            | 血脂                  | 检查时间: ____年__月__日<br>甘油三酯: ____mmol/L,<br>胆固醇: ____mmol/L<br>低密度脂蛋白胆固醇: ____mmol/L,<br>高密度脂蛋白胆固醇: __mmol/                                                                                     |
| 7.3                       | Homocysteine                                                                         | Testing time :<br>____Year__month__day<br>Homocysteine: __μmol/L                                                                                                                                                                                                                                                           | 同型半胱氨酸              | 检查时间: ____年__月__日<br>同型半胱氨酸: __μmol/L                                                                                                                                                         |

|                                                                                     | English version                               |                                                                                                                                                                                                  | 中文版本                 |                                                                                                                                                      |
|-------------------------------------------------------------------------------------|-----------------------------------------------|--------------------------------------------------------------------------------------------------------------------------------------------------------------------------------------------------|----------------------|------------------------------------------------------------------------------------------------------------------------------------------------------|
| <b>8. Stroke Risk Rating</b>                                                        |                                               |                                                                                                                                                                                                  |                      |                                                                                                                                                      |
| 8.1.1                                                                               | Hypertension                                  | <input type="radio"/> Yes<br><input type="radio"/> No                                                                                                                                            | 高血压:                 | <input type="radio"/> 有<br><input type="radio"/> 无                                                                                                   |
| 8.1.2                                                                               | Dyslipidemia                                  | <input type="radio"/> Yes<br><input type="radio"/> No                                                                                                                                            | 血脂异常                 | <input type="radio"/> 有<br><input type="radio"/> 无                                                                                                   |
| 8.1.3                                                                               | Diabetes                                      | <input type="radio"/> Yes<br><input type="radio"/> No                                                                                                                                            | 糖尿病                  | <input type="radio"/> 有<br><input type="radio"/> 无                                                                                                   |
| 8.1.4                                                                               | Atrial fibrillation or valvular heart disease | <input type="radio"/> Yes<br><input type="radio"/> No                                                                                                                                            | 房颤或瓣膜性心脏病            | <input type="radio"/> 有<br><input type="radio"/> 无                                                                                                   |
| 8.1.5                                                                               | History of smoking                            | <input type="radio"/> Yes<br><input type="radio"/> No                                                                                                                                            | 吸烟史                  | <input type="radio"/> 有<br><input type="radio"/> 无                                                                                                   |
| 8.1.6                                                                               | Significantly overweight or obese             | <input type="radio"/> Yes<br><input type="radio"/> No                                                                                                                                            | 超重或者肥胖               | <input type="radio"/> 有<br><input type="radio"/> 无                                                                                                   |
| 8.1.7                                                                               | Lack of exercise                              | <input type="radio"/> Yes<br><input type="radio"/> No                                                                                                                                            | 缺乏运动                 | <input type="radio"/> 有<br><input type="radio"/> 无                                                                                                   |
| 8.1.8                                                                               | Family history of stroke                      | <input type="radio"/> Yes<br><input type="radio"/> No                                                                                                                                            | 卒中家族史                |                                                                                                                                                      |
| 8.1.9                                                                               | Past stroke:                                  | <input type="radio"/> Yes<br><input type="radio"/> No                                                                                                                                            | 既往脑卒中                | <input type="radio"/> 有 <input type="radio"/> 无                                                                                                      |
| 8.1.10                                                                              | Past transient ischemic attack                | <input type="radio"/> Yes<br><input type="radio"/> No                                                                                                                                            | 既往短暂性脑缺血             | <input type="radio"/> 有 <input type="radio"/> 无                                                                                                      |
| 8.2                                                                                 | Risk classification                           | <input type="radio"/> Stroke<br><input type="radio"/> TIA<br><input type="radio"/> High risk: Risk factors $\geq$ 3<br><input type="radio"/> Intermediate risk<br><input type="radio"/> Low risk | 风险分级                 | <input type="radio"/> 脑卒中<br><input type="radio"/> TIA<br><input type="radio"/> 高危:危险因素大于等于3<br><input type="radio"/> 中危<br><input type="radio"/> 低危 |
| 8.3                                                                                 | Danger signs                                  | <input type="radio"/> Stroke<br><input type="radio"/> TIA<br><input type="radio"/> High risk: Risk factors $\geq$ 3<br><input type="radio"/> Intermediate risk<br><input type="radio"/> Low risk | 危险标识                 | <input type="radio"/> 脑卒中<br><input type="radio"/> TIA<br><input type="radio"/> 高危:危险因素大于等于3<br><input type="radio"/> 中危<br><input type="radio"/> 低危 |
| 8.4                                                                                 | Hierarchical management                       | Strengthen management<br>Standardized management<br>health management                                                                                                                            | 管理分级                 | 强化管理<br>规范化管理<br>健康管理                                                                                                                                |
| <b>9. Neck vascular ultrasound (required for high-risk groups, TIA, and Stroke)</b> |                                               |                                                                                                                                                                                                  |                      |                                                                                                                                                      |
| 9.1                                                                                 | Test results                                  | <input type="radio"/> All are normal<br><input type="radio"/> Any part is abnormal (Skip to 9.2-9.4)                                                                                             | 检查结果                 | <input type="radio"/> 全部正常<br><input type="radio"/> 任一部位有异常 (完成 9.2-9.4)                                                                             |
| 9.2                                                                                 | Intimal IMT ( $\geq$ 1.0mm)                   | <input type="radio"/> Left common carotid artery<br><input type="radio"/> Right common carotid artery                                                                                            | 内膜增厚 ( $\geq$ 1.0mm) | <input type="radio"/> 左侧颈总动脉<br><input type="radio"/> 右侧颈总动脉                                                                                         |

|                                                              |                     | English version                                                                                                                                                                                                                                                                                                                                                                                                                                                                                                                                                                                                                                                                                                                                                                                                                                                                                                                                                                                                | 中文版本       |                                                                                                                                                                                                                                                                                                                                                                                                                                                                                                                                                                                                                                                                                                                                                                      |
|--------------------------------------------------------------|---------------------|----------------------------------------------------------------------------------------------------------------------------------------------------------------------------------------------------------------------------------------------------------------------------------------------------------------------------------------------------------------------------------------------------------------------------------------------------------------------------------------------------------------------------------------------------------------------------------------------------------------------------------------------------------------------------------------------------------------------------------------------------------------------------------------------------------------------------------------------------------------------------------------------------------------------------------------------------------------------------------------------------------------|------------|----------------------------------------------------------------------------------------------------------------------------------------------------------------------------------------------------------------------------------------------------------------------------------------------------------------------------------------------------------------------------------------------------------------------------------------------------------------------------------------------------------------------------------------------------------------------------------------------------------------------------------------------------------------------------------------------------------------------------------------------------------------------|
| 9.3                                                          | Plaque              | <input type="radio"/> Pattern (1=irregular, 0=regular)<br><input type="radio"/> Ulcer (1=Yes, 0=No)<br><input type="radio"/> Echo (1=strong echo, 2=moderate echo acoustic, 3=low echo, 4=mixed echo)                                                                                                                                                                                                                                                                                                                                                                                                                                                                                                                                                                                                                                                                                                                                                                                                          | 斑块         | <input type="radio"/> 形态(1=不规则,0=规则)<br><input type="radio"/> 溃疡(1=有,0=无)<br><input type="radio"/> 回声(1=强回声,2=中等回声, 3=低回声,4=混合回声)                                                                                                                                                                                                                                                                                                                                                                                                                                                                                                                                                                                                                                    |
| 9.4                                                          | Narrow or occlusion | Stenosis rate<br><input type="radio"/> 0= no stenosis<br><input type="radio"/> 1=1-49%,<br><input type="radio"/> 2=50-69%,<br><input type="radio"/> 3=70-99%,<br><input type="radio"/> 4=Occlusion                                                                                                                                                                                                                                                                                                                                                                                                                                                                                                                                                                                                                                                                                                                                                                                                             | 狭窄或者闭塞     | 狭窄率<br><input type="radio"/> 0= 无狭窄<br><input type="radio"/> 1=1-49%,<br><input type="radio"/> 2=50-69%,<br><input type="radio"/> 3=70-99%,<br><input type="radio"/> 4=闭塞                                                                                                                                                                                                                                                                                                                                                                                                                                                                                                                                                                                            |
| 10. Surgical or interventional treatment of vascular lesions |                     |                                                                                                                                                                                                                                                                                                                                                                                                                                                                                                                                                                                                                                                                                                                                                                                                                                                                                                                                                                                                                |            |                                                                                                                                                                                                                                                                                                                                                                                                                                                                                                                                                                                                                                                                                                                                                                      |
| 10.1                                                         | Carotid artery      |                                                                                                                                                                                                                                                                                                                                                                                                                                                                                                                                                                                                                                                                                                                                                                                                                                                                                                                                                                                                                | 颈动脉        |                                                                                                                                                                                                                                                                                                                                                                                                                                                                                                                                                                                                                                                                                                                                                                      |
| 10.1.1                                                       | CAS                 | <input type="radio"/> No<br><input type="radio"/> Yes,<br><input type="radio"/> Left <input type="radio"/> Right <input type="radio"/> Bilateral<br>Operation time: □□□□ year<br>Institution performing CAS:<br>Postoperative follow-up:<br><input type="radio"/> No<br><input type="radio"/> Yes,<br>Follow-up time:<br><input type="checkbox"/> 3 months after surgery,<br><input type="checkbox"/> 6 months after surgery,<br><input type="checkbox"/> 1 year after surgery,<br><input type="checkbox"/> 2 years or more after surgery<br>Examination methods:<br><input type="checkbox"/> ultrasound,<br><input type="checkbox"/> CTA,<br><input type="checkbox"/> MRI,<br><input type="checkbox"/> DSA<br>Postoperative restenosis:<br><input type="radio"/> No<br><input type="radio"/> Yes<br>Reintervention:<br><input type="radio"/> No<br><input type="radio"/> Yes<br>Treatment:<br><input type="checkbox"/> CEA<br><input type="checkbox"/> CAS<br><input type="checkbox"/> Conservative Treatment | CAS, 支架术   | <input type="radio"/> 否<br><input type="radio"/> 是,<br><input type="radio"/> 左 <input type="radio"/> 右 <input type="radio"/> 双侧<br>手术时间: □□□□年<br>CAS 机构名称:<br>术后复查:<br><input type="radio"/> 否<br><input type="radio"/> 是,<br>复查时间:<br><input type="checkbox"/> 术后 3 个月<br><input type="checkbox"/> 术后 6 个月<br><input type="checkbox"/> 术后一年<br><input type="checkbox"/> 术后两年及以上<br>复查检查方式:<br><input type="checkbox"/> 超声<br><input type="checkbox"/> CTA<br><input type="checkbox"/> MRI<br><input type="checkbox"/> DSA<br>术后再狭窄:<br><input type="radio"/> 否<br><input type="radio"/> 是<br>再次干预:<br><input type="radio"/> 否<br><input type="radio"/> 是<br>治疗方式:<br><input type="checkbox"/> CEA<br><input type="checkbox"/> CAS<br><input type="checkbox"/> 保守治疗 |
| 10.1.2                                                       | CEA                 | <input type="radio"/> No<br><input type="radio"/> Yes,                                                                                                                                                                                                                                                                                                                                                                                                                                                                                                                                                                                                                                                                                                                                                                                                                                                                                                                                                         | 内膜剥脱术, CEA | <input type="radio"/> 否<br><input type="radio"/> 是,                                                                                                                                                                                                                                                                                                                                                                                                                                                                                                                                                                                                                                                                                                                  |

|        |                                               | English version                                                                                                                                                                                                                                                                                                                                                                                                                                                                                                                                                                                                                                                                                                                                                                                                                                                                                                                                      |               | 中文版本                                                                                                                                                                                                                                                                                                                                                                                                                                                                                                                                                                                                                                                                                                          |
|--------|-----------------------------------------------|------------------------------------------------------------------------------------------------------------------------------------------------------------------------------------------------------------------------------------------------------------------------------------------------------------------------------------------------------------------------------------------------------------------------------------------------------------------------------------------------------------------------------------------------------------------------------------------------------------------------------------------------------------------------------------------------------------------------------------------------------------------------------------------------------------------------------------------------------------------------------------------------------------------------------------------------------|---------------|---------------------------------------------------------------------------------------------------------------------------------------------------------------------------------------------------------------------------------------------------------------------------------------------------------------------------------------------------------------------------------------------------------------------------------------------------------------------------------------------------------------------------------------------------------------------------------------------------------------------------------------------------------------------------------------------------------------|
|        |                                               | <input type="radio"/> Left <input type="radio"/> Right <input type="radio"/> Bilateral<br>Operation time: □□□□ year<br>Institution performing CAS:<br>Postoperative follow-up:<br><input type="radio"/> No<br><input type="radio"/> Yes,<br>Follow-up time:<br><input type="checkbox"/> 3 months after surgery,<br><input type="checkbox"/> 6 months after surgery,<br><input type="checkbox"/> 1 year after surgery,<br><input type="checkbox"/> 2 years or more after surgery<br>Examination methods:<br><input type="checkbox"/> ultrasound,<br><input type="checkbox"/> CTA,<br><input type="checkbox"/> MRI,<br><input type="checkbox"/> DSA<br>Postoperative restenosis:<br><input type="radio"/> No<br><input type="radio"/> Yes<br>Reintervention:<br><input type="radio"/> No<br><input type="radio"/> Yes<br>Treatment:<br><input type="checkbox"/> CEA<br><input type="checkbox"/> CAS<br><input type="checkbox"/> Conservative Treatment |               | <input type="radio"/> 左 <input type="radio"/> 右 <input type="radio"/> 双侧<br>手术时间: □□□□年<br>CAS 机构名称:<br>术后复查:<br><input type="radio"/> 否<br><input type="radio"/> 是,<br>复查时间:<br><input type="checkbox"/> 术后 3 个月<br><input type="checkbox"/> 术后 6 个月<br><input type="checkbox"/> 术后一年<br><input type="checkbox"/> 术后两年及以上<br>复查检查方式:<br><input type="checkbox"/> 超声<br><input type="checkbox"/> CTA<br><input type="checkbox"/> MRI<br><input type="checkbox"/> DSA<br>术后再狭窄:<br><input type="radio"/> 否<br><input type="radio"/> 是<br>再次干预:<br><input type="radio"/> 否<br><input type="radio"/> 是<br>治疗方式:<br><input type="checkbox"/> CEA<br><input type="checkbox"/> CAS<br><input type="checkbox"/> 保守治疗 |
| 10.1.3 | Intracranial and extracranial vascular bypass | <input type="radio"/> No<br><input type="radio"/> Yes,<br>operation time: □□□□ years                                                                                                                                                                                                                                                                                                                                                                                                                                                                                                                                                                                                                                                                                                                                                                                                                                                                 | 颅内血管搭桥术       | <input type="radio"/> 否<br><input type="radio"/> 是,<br>手术时间: □□□□年                                                                                                                                                                                                                                                                                                                                                                                                                                                                                                                                                                                                                                            |
| 10.2   | Coronary artery                               |                                                                                                                                                                                                                                                                                                                                                                                                                                                                                                                                                                                                                                                                                                                                                                                                                                                                                                                                                      | 冠状动脉          |                                                                                                                                                                                                                                                                                                                                                                                                                                                                                                                                                                                                                                                                                                               |
| 10.2.1 | Interventional procedure (PCI)                | <input type="radio"/> No<br><input type="radio"/> Yes,<br>operation time: □□□□ years                                                                                                                                                                                                                                                                                                                                                                                                                                                                                                                                                                                                                                                                                                                                                                                                                                                                 | 介入术 (PCI)     | <input type="radio"/> 否<br><input type="radio"/> 是,<br>手术时间: □□□□年                                                                                                                                                                                                                                                                                                                                                                                                                                                                                                                                                                                                                                            |
| 10.2.2 | Bypass surgery (CABG)                         | <input type="radio"/> No<br><input type="radio"/> Yes,<br>operation time: □□□□ years                                                                                                                                                                                                                                                                                                                                                                                                                                                                                                                                                                                                                                                                                                                                                                                                                                                                 | 搭桥术 (CABG)    | <input type="radio"/> 否<br><input type="radio"/> 是,<br>手术时间: □□□□年                                                                                                                                                                                                                                                                                                                                                                                                                                                                                                                                                                                                                                            |
| 10.3   | Surgical treatment of hemorrhagic stroke      | Surgical treatment for hemorrhagic stroke: <input type="radio"/> No<br><input type="radio"/> Yes,<br>Treatment method:<br>Treatment time: □□□□ years                                                                                                                                                                                                                                                                                                                                                                                                                                                                                                                                                                                                                                                                                                                                                                                                 | 出血性卒中<br>外科治疗 | 是否接受过出外科治疗<br><input type="radio"/> 否<br><input type="radio"/> 是,<br>治疗方式:<br>治疗时间: □□□□年                                                                                                                                                                                                                                                                                                                                                                                                                                                                                                                                                                                                                     |

#### **eAppendix 4. Stroke Base Hospitals Participating in the Screening**

Anhui Provincial Hospital, The First Affiliated Hospital of Anhui Medical University, Anqing Municipal Hospital, Fuyang People's Hospital, The First People's Hospital of Huainan City, Maanshan City People's Hospital, Suzhou Municipal Hospital, Tongling People's Hospital, The Second People's Hospital of Wuhu City, Peking University Third Hospital, Dongfang Hospital of Beijing University of Chinese Medicine, Characteristic Medical Center of the PLA Strategic Support Force, Beijing Anzhen Hospital of Capital Medical University, Beijing Luhe Hospital of Capital Medical University, Capital Medical University Xuanwu Hospital, China Academy of Chinese Medical Sciences Xiyuan Hospital, Fujian Provincial Hospital, The Second Affiliated Hospital of Fujian Medical University, The First Affiliated Hospital of Fujian Medical University, Longyan First Hospital, Ningde City Hospital Affiliated to Ningde Normal University, Sanming First Hospital, The First Affiliated Hospital of Xiamen University, The First People's Hospital of Baiyin City, Gansu Provincial People's Hospital, Jiuquan People's Hospital, Lanzhou University Second Hospital, Qingyang People's Hospital, The First People's Hospital of Tianshui City, Wuwei City People's Hospital, Qingyuan People's Hospital, Shenzhen Second People's Hospital, Yuebei People's Hospital, Zhanjiang Central People's Hospital, Zhongshan People's Hospital, Zhuhai People's Hospital, Baise City People's Hospital, Beihai City People's Hospital, People's Hospital of Guangxi Zhuang Autonomous Region, Liuzhou Workers' Hospital, Qinzhou Second People's Hospital, Wuzhou Red Cross Hospital, The First People's Hospital of Yulin City, Guizhou Provincial People's Hospital, Affiliated Hospital of Guizhou Medical University, Haikou People's Hospital, Hainan Provincial People's Hospital, Sanya People's Hospital, Sanya Central Hospital, Baoding First Hospital, Cangzhou Central Hospital, Chengde Central Hospital, Dingzhou People's Hospital, Harrison International Peace Hospital, Handan City First Hospital, Hebei Provincial People's Hospital, The Second Hospital of Hebei Medical University, The First Hospital of Hebei Medical University, The First Hospital of Qinhuangdao City, Shijiazhuang Third Hospital, Xingtai City People's Hospital, Anyang People's Hospital, Huaihe Hospital of Henan University, The First Affiliated Hospital of Henan University of Science and Technology, Henan Provincial People's Hospital, Hebi City People's Hospital, Jiyuan City People's Hospital, Second People's Hospital of Jiaozuo City, Luoyang Central Hospital, Luohe Central Hospital, Nanyang Nanshi Hospital, Nanyang Central Hospital, Pingdingshan First People's Hospital, Puyang Oilfield General Hospital, Sanmenxia Central Hospital, The First People's Hospital of Shangqiu City, The First Affiliated Hospital of Xinxiang Medical College, Xinyang Central Hospital, Xuchang Central Hospital, The Fifth Affiliated Hospital of Zhengzhou University, First Affiliated Hospital of Zhengzhou University, Zhengzhou People's Hospital, Zhoukou Central Hospital, Zhumadian Central Hospital, Daqing Oilfield General Hospital, Harbin Second Hospital, The Second Affiliated Hospital of Harbin Medical University, Heilongjiang Provincial Hospital, The First Affiliated Hospital of Jiamusi University, Mudanjiang Second People's Hospital, Qiqihar First Hospital, Huazhong University of Science Tongji Hospital, Tongji Medical College, The First People's Hospital of Jingmen City, Taihe Hospital of Shiyan City, Wuhan First Hospital, Xiangyang First People's Hospital, Xiaogan Central Hospital, Yichang Central People's Hospital, Changde First People's Hospital, The First People's Hospital of Chenzhou City, Hunan Provincial Brain Hospital, Hunan Provincial People's Hospital, The First

People's Hospital of Huaihua City, Liuyang City Jili Hospital, The First Affiliated Hospital of Nanhua University, Shaoyang Central Hospital, Xiangtan Central Hospital, Yongzhou Central Hospital, Yueyang First People's Hospital, Changsha Central Hospital, Xiangya Hospital of Central South University, Zhuzhou Central Hospital, The First Hospital of Jilin University, Jilin Provincial People's Hospital, Jilin Central Hospital, Siping Central Hospital, Songyuan Central Hospital, Tonghua Central Hospital, Affiliated Hospital of Yanbian University, Changzhou First People's Hospital, Jiangsu Provincial People's Hospital, Lianyungang First People's Hospital, Nanjing Gulou Hospital, Nanjing Brain Hospital, Nantong University Hospital, Subei People's Hospital, The First Affiliated Hospital of Soochow University, Wuxi Second People's Hospital, Affiliated Hospital of Xuzhou Medical University, Yancheng First People's Hospital, Ganzhou People's Hospital, Jiangxi Provincial People's Hospital, The First People's Hospital of Jingdezhen City, The First People's Hospital of Jiujiang City, The Second Affiliated Hospital of Nanchang University, The First Affiliated Hospital of Nanchang University, Pingxiang City People's Hospital, Xinyu City People's Hospital, Yichun City People's Hospital, Benxi Central Hospital, Chaoyang Central Hospital, Dalian Central Hospital, Dandong Central Hospital, Jinzhou Central Hospital, Liaoning Provincial People's Hospital, Liaoyang Central Hospital, Shenyang First People's Hospital, Yingkou Central Hospital, General Hospital of the Northern Theater of the Chinese People's Liberation Army, The First Affiliated Hospital of China Medical University, Baotou Central Hospital, Chifeng City Hospital, Ordos Central Hospital, Inner Mongolia Forestry General Hospital, Affiliated Hospital of Inner Mongolia Medical University, People's Hospital of Inner Mongolia Autonomous Region, People's Hospital of Ningxia Hui Autonomous Region, General Hospital of Ningxia Medical University, Affiliated Hospital of Qinghai University, Qinghai Provincial People's Hospital, Affiliated Hospital of Binzhou Medical University, Dezhou People's Hospital, The First People's Hospital of Jining City, Liaocheng Second People's Hospital, Liaocheng People's Hospital, Linyi City People's Hospital, Qingdao University Hospital, Qilu Hospital of Shandong University, Shandong Provincial Hospital, Qianfoshan Hospital of Shandong Province, Shengli Oilfield Central Hospital, Tai'an Central Hospital, Weihai Municipal Hospital, Affiliated Hospital of Weifang Medical College, Yantai Yuhuangding Hospital, The Third People's Hospital of Datong City, Sinopharm Tongmei General Hospital, The First People's Hospital of Jinzhong City, Linfen Central Hospital, Fenyang Hospital of Shanxi Province, Shanxi Provincial People's Hospital, The First Hospital of Shanxi Medical University, Yangmei Group General Hospital, Yuncheng Central Hospital, Heping Hospital Affiliated to Changzhi Medical College, Hanzhong Central Hospital, Shaanxi Provincial People's Hospital, The First Affiliated Hospital of Xi'an Jiaotong University, Affiliated Hospital of Yan'an University, Yulin Second Hospital, 3201 Hospital, Shanghai Pudong Hospital, Shuguang Hospital Affiliated to Shanghai University of Traditional Chinese Medicine, Affiliated Hospital of North Sichuan Medical College, Deyang People's Hospital, Leshan City People's Hospital, Mianyang Central Hospital, Nanchong Central Hospital, West China Hospital of Sichuan University, Sichuan Provincial People's Hospital, Suining Central Hospital, Affiliated Hospital of Southwest Medical University, Yibin Second People's Hospital, The First People's Hospital of Zigong City, Tianjin First Central Hospital, Tianjin Huanhu Hospital, The Second Hospital of Tianjin Medical University, Tianjin Medical University General Hospital, General Hospital of Tibet Military Region, The First People's Hospital of Kashgar, People's Hospital of Xinjiang Uygur Autonomous Region,

The Fifth Affiliated Hospital of Xinjiang Medical University, Dali Bai Autonomous Prefecture People's Hospital, The First People's Hospital of Qujing City, Yuxi City People's Hospital, The First People's Hospital of Yunnan Province, Hangzhou First People's Hospital, Huzhou Central Hospital, Lishui Central Hospital, Shaoxing People's Hospital, Second Affiliated Hospital of Zhejiang University School of Medicine, Taizhou Hospital, The First Affiliated Hospital of Army Medical University, Chinese People's Liberation Army Army Characteristic Medical Center, Three Gorges Hospital Affiliated to Chongqing University, Chongqing People's Hospital.

**eFigure 1.** Map of Study Sites Participated in the Cross-Sectional Survey

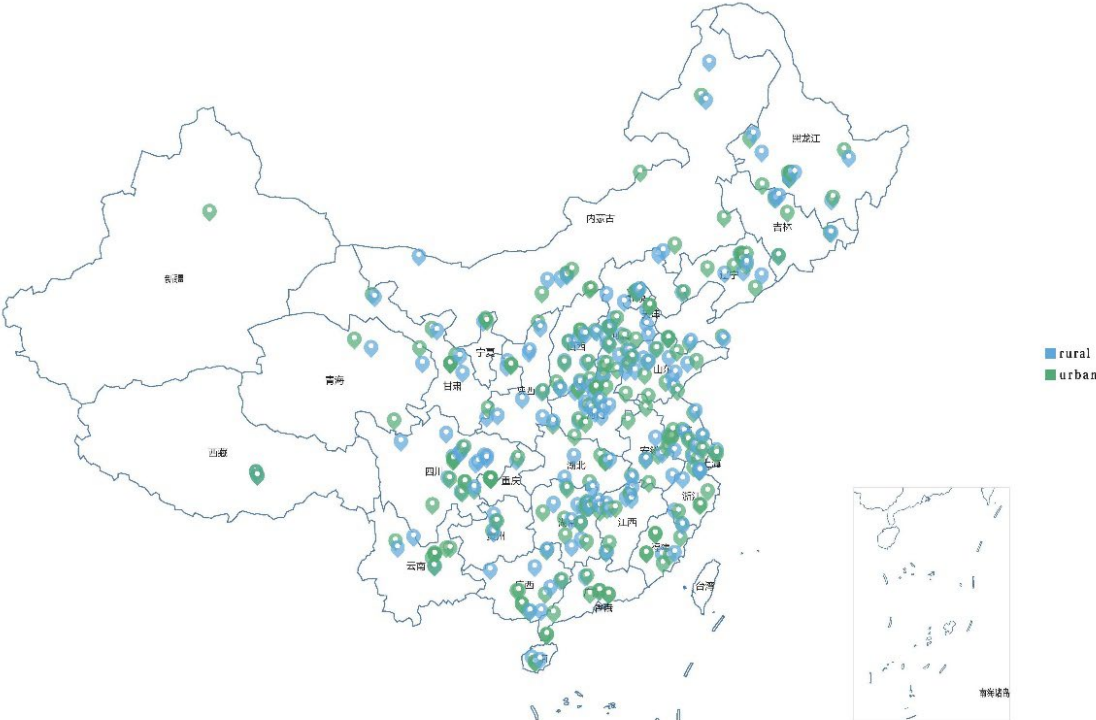



**eFigure 2.** Age-Standardized and Sex-Standardized Prevalence of Stroke Stratified by Provinces

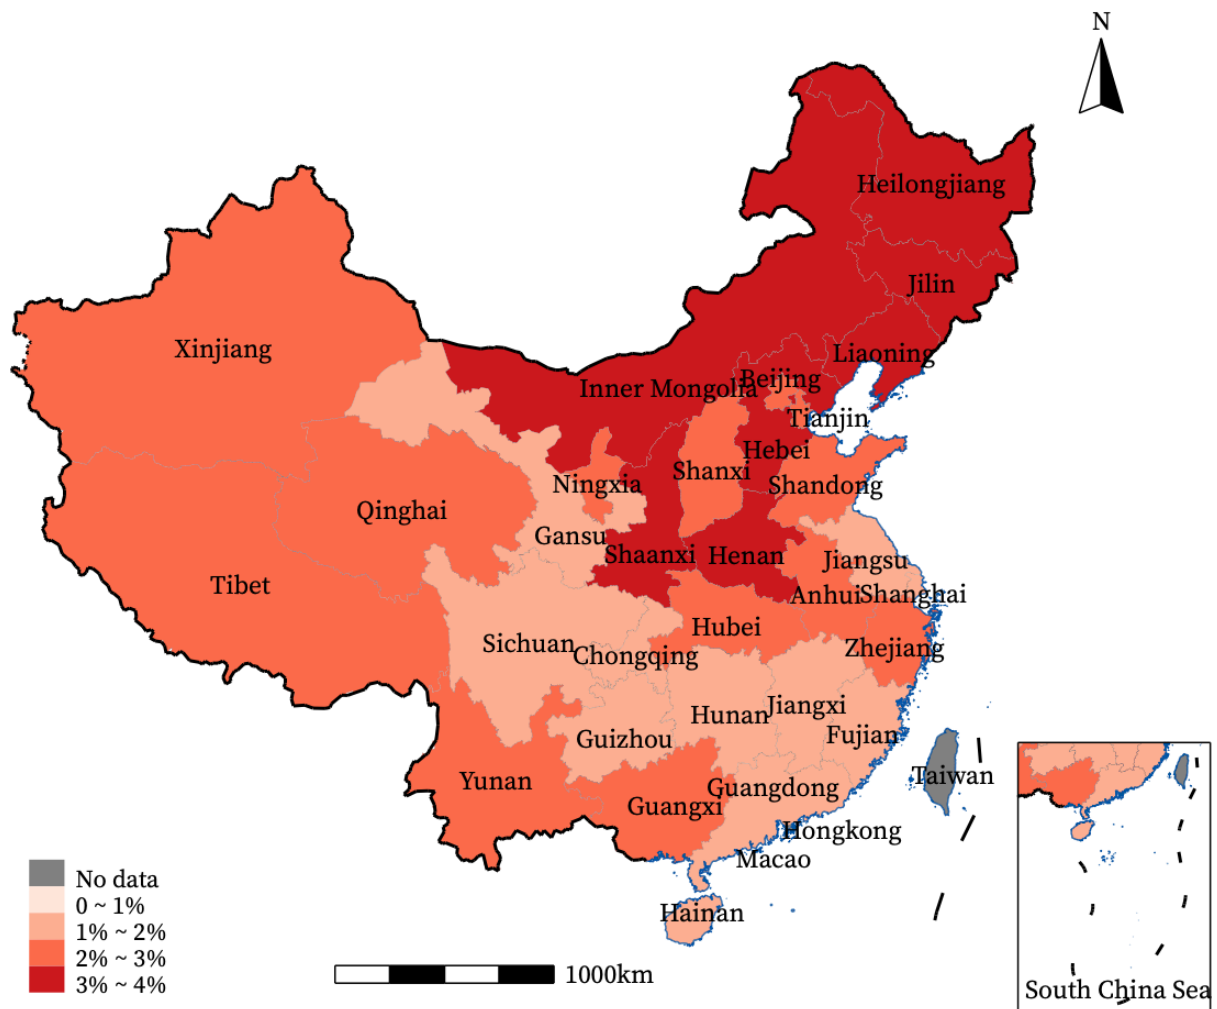

**eFigure 3.** The Age-Standardized and Sex-Standardized Incidence of Stroke Stratified by Provinces

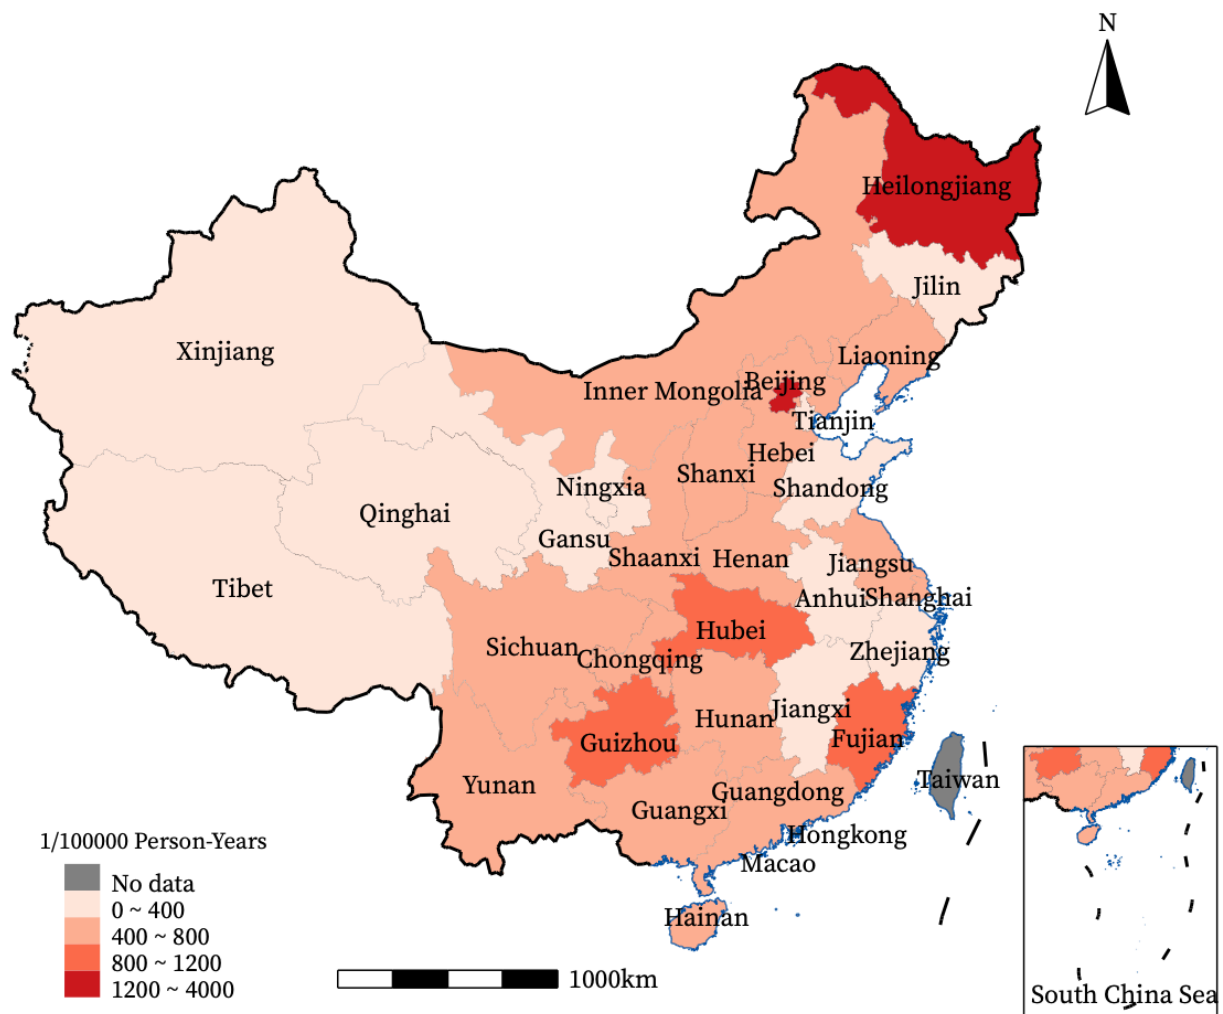

**eFigure 4.** The Age-Standardized and Sex-Standardized Mortality of Stroke Stratified by Provinces

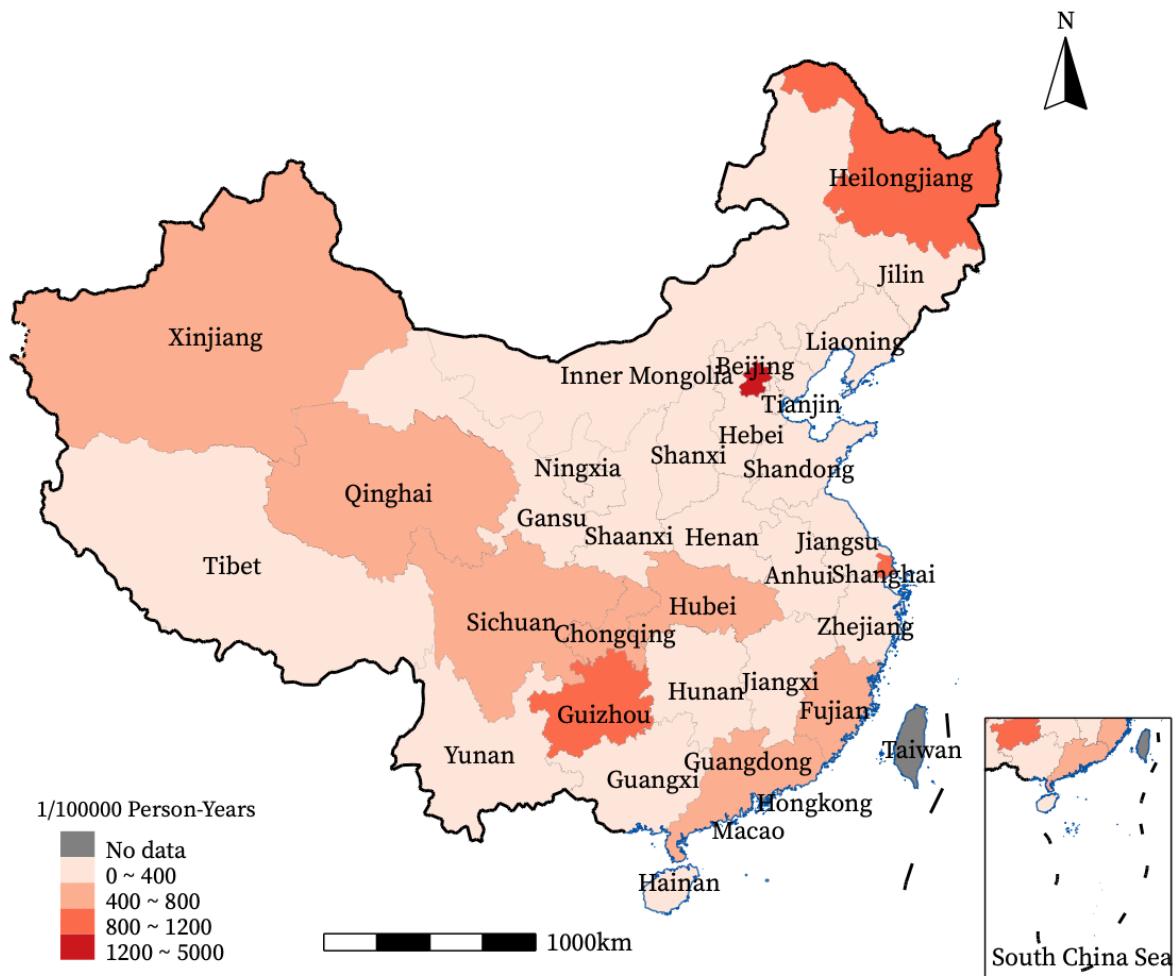

**eTable 1.** Baseline Characteristics of All Participants Stratified by Locality in 2020

| Characteristics       | All            | Urban         | Rural         | P      |
|-----------------------|----------------|---------------|---------------|--------|
| Total                 | 676,394(100.0) | 350,824(51.9) | 325,570(48.1) | –      |
| Mean age (SD), years  | 59.7(11.0)     | 59.7(10.9)    | 59.8(11.1)    | <.0001 |
| Age Group, years      |                |               |               |        |
| 40–49                 | 143,135(21.2)  | 74,865(21.3)  | 68,270(21.0)  | <.0001 |
| 50–59                 | 206,193(30.5)  | 105,229(30.0) | 100,964(31.0) |        |
| 60–69                 | 190,424(28.2)  | 102,232(29.1) | 88,192(27.1)  |        |
| 70–79                 | 107,513(15.9)  | 54,275(15.5)  | 53,238(16.4)  |        |
| 80+                   | 29,129(4.3)    | 14,626(4.2)   | 14,503(4.5)   |        |
| Sex                   |                |               |               |        |
| Male                  | 281,272(41.6)  | 144,638(41.2) | 136,634(42.0) | <.0001 |
| Female                | 395,122(58.4)  | 206,186(58.8) | 188,936(58.0) | <.0001 |
| Socioeconomic status  |                |               |               |        |
| Education             |                |               |               |        |
| High school or less   | 618,976(91.5)  | 303,844(86.6) | 315,132(96.8) | <.0001 |
| College/undergraduate | 56,032(8.3)    | 45,751(13.0)  | 10,281(3.2)   |        |
| Postgraduate          | 1,376(0.2)     | 1,219(0.3)    | 157(0.05)     |        |
| Annual income, RMB    |                |               |               |        |
| ≤10000                | 270,260(40.1)  | 83,872(23.9)  | 186,388(57.4) | <.0001 |
| >10000                | 406,134(59.9)  | 266,952(76.1) | 139,182(42.6) |        |
| Geographical Regions  |                |               |               |        |
| North                 | 101,096(15.0)  | 47,659(13.6)  | 53,437(16.4)  | <.0001 |
| Northeast             | 57,672(8.5)    | 32,290(9.2)   | 25,382(7.8)   |        |
| East                  | 203,041(30.0)  | 110,633(31.5) | 92,408(28.4)  |        |
| Central               | 127,778(18.9)  | 62,823(17.9)  | 64,955(20.0)  |        |
| South                 | 51,602(7.6)    | 32,443(9.2)   | 19,159(5.9)   |        |
| Southwest             | 85,713(12.7)   | 46,006(13.1)  | 39,707(12.2)  |        |
| Northwest             | 49,492(7.3)    | 18,970(5.4)   | 30,522(9.4)   |        |

| Characteristics               | All           | Urban         | Rural         | P      |
|-------------------------------|---------------|---------------|---------------|--------|
| Economic level††              |               |               |               |        |
| Undeveloped                   | 73,608(10.9)  | 49,232(14.0)  | 24,376(7.5)   | <.0001 |
| Intermediately                | 129,157(19.1) | 68,305(19.5)  | 60,852(18.7)  |        |
| Developed                     | 473,629(70.0) | 233,287(66.5) | 240,342(73.8) |        |
| Behavioral factors            |               |               |               |        |
| Smoking                       | 89,089(13.2)  | 39,985(11.4)  | 49,104(15.1)  | <.0001 |
| Drinking                      | 107,052(15.8) | 54,697(15.6)  | 52,355(16.1)  | <.0001 |
| Physical inactivity††††       | 161,705(23.9) | 76,910(21.9)  | 84,795(26.0)  | <.0001 |
| Weight status                 |               |               |               |        |
| BMI groups, kg/m <sup>2</sup> |               |               |               |        |
| <18.5                         | 13,848(2.1)   | 6,062(1.7)    | 7,786(2.4)    | <.0001 |
| 18.5–23.9                     | 306,626(45.3) | 156,910(44.7) | 149,716(46.0) |        |
| 24.0–27.9                     | 267,681(39.6) | 142,730(40.7) | 124,951(38.4) |        |
| ≥28.0                         | 88,239(13.1)  | 45,122(12.9)  | 43,117(13.2)  |        |
| Underlying disease            |               |               |               |        |
| History of stroke             |               |               |               |        |
| IS                            | 20,276(3.0)   | 11,115(3.2)   | 9,161(2.8)    | <.0001 |
| ICH                           | 2,782(0.4)    | 1,400(0.4)    | 1,382(0.4)    | .10    |
| SAH                           | 319(0.05)     | 200(0.1)      | 119(0.03)     | .0001  |
| TIA                           | 5,672(0.8)    | 3,058(0.9)    | 2,614(0.8)    | <.0001 |
| Atrial fibrillation           | 4,328(0.6)    | 2,532(0.7)    | 1,796(0.6)    | <.0001 |
| History of heart disease      | 33,712(5.0)   | 19,293(5.5)   | 14,419(4.4)   | <.0001 |
| Hypertension††††              |               |               |               |        |
| Prevalence                    | 302,676(44.8) | 155,724(44.4) | 146,952(45.1) | <.0001 |
| Awareness rate                | 181,324(59.9) | 95,080(61.1)  | 86,244(58.7)  | <.0001 |
| Treatment rate                | 152,467(50.4) | 82,241(52.8)  | 70,226(47.8)  | <.0001 |
| Control rate                  | 84,213(27.8)  | 46,741(30.0)  | 37,472(25.5)  | <.0001 |

| Characteristics          | All           | Urban         | Rural         | P      |
|--------------------------|---------------|---------------|---------------|--------|
| Diabetes††††             |               |               |               |        |
| Prevalence               | 143,331(21.2) | 78,877(22.5)  | 64,454(19.8)  | <.0001 |
| Awareness rate           | 61,633(43.0)  | 37,175(47.1)  | 24,458(37.9)  | <.0001 |
| Treatment rate           | 49,673(34.7)  | 30,680(38.9)  | 18,993(29.5)  | <.0001 |
| Control rate             | 89,237(62.3)  | 48,937(62.0)  | 40,300(62.5)  | <.0001 |
| Dyslipidemia††††         |               |               |               |        |
| Prevalence               | 252,307(37.3) | 136,329(38.9) | 115,978(35.6) | <.0001 |
| Awareness rate           | 86,163(34.2)  | 50,745(37.2)  | 35,418(30.5)  | <.0001 |
| Treatment rate           | 26,762(10.6)  | 17,288(12.7)  | 9,474(8.2)    | <.0001 |
| Control rate             | 49,302(19.5)  | 28,475(20.9)  | 20,827(18.0)  | <.0001 |
| Family history of stroke | 68,025(10.1)  | 37,891(10.8)  | 30,134(9.3)   | <.0001 |

†The results were presented as n (percentages) for categorical variables and as mean (Standard deviation, SD) for continuous variables.

††Please refer to the supplementary materials for the division of economic level of Chinese cities

†††Current Chinese criteria define general obesity as a BMI of 28 kg/m<sup>2</sup> or higher.

††††Physical inactivity was defined according to World Health Organization's recommendations standard (at least 150 min of moderate-intensity, or 75 min of vigorous-intensity physical activity per week, or any equivalent combination of the two).

††††† Prevalence=the number of diseases / the total number of participants \* 100%; Awareness rate= Number of patients who knew they had the disease/total number of patients\*100%; Treatment rate= Number of patients taking treatment /total number of patients\*100%; Control rate= The number of patients who reach the clinical control standard / the total number of patients \* 100%.

BMI, body mass index; WC, Waist circumference; CNY, Chinese Yuan; SBP, Systolic blood pressure; DBP, Diastolic blood pressure; FPG, fasting plasma glucose; TC, Total cholesterol; IS, ischaemic stroke; ICH, intracerebral haemorrhage; SAH, 0 haemorrhage; TIA, Transient ischaemic attack

**eTable 2.** Respond Rate Calculator of the 2020 National Stroke High-Risk Population Screening Program According to American Association for Public Opinion Research (AAPOR)

|                                                                 | Urban  | Rural  | All    |
|-----------------------------------------------------------------|--------|--------|--------|
| <b>Interview (Category 1)</b>                                   |        |        |        |
| Complete (all versions)                                         | 372800 | 334769 | 707569 |
| Partial (all versions)                                          | 2399   | 1576   | 3975   |
| <b>Eligible, non-interview (Category 2)</b>                     |        |        |        |
| Refusal and breakoff (phone, IPHH, mail, mail_U)                | 26775  | 3044   | 29819  |
| Refusal (phone, IPHH, mail, web)                                | 3783   | 211    | 3994   |
| Household-level refusal (phone, IPHH, mail, web)                |        |        |        |
| Known-respondent refusal (phone, IPHH, mail, web)               | 4875   | 2300   | 7217   |
| Implicit refusal (phone, mail, mail_U)                          |        |        |        |
| Break off/ Implicit refusal (phone, mail, web, mail_U)          |        | 42     |        |
| Non-contact (phone, IPHH, mail, web, mail_U)                    |        |        |        |
| Respondent unavailable during field period (IPHH, mail, mail_U) | 5883   | 2432   | 8315   |
| Other, non-refusals (phone, IPHH, mail, web, mail_U)            | 11753  | 5754   | 17507  |
| <b>Total sample used</b>                                        | 428268 | 350128 | 778396 |
| I=Complete Interviews                                           | 372800 | 334769 | 707569 |
| P=Partial Interviews                                            | 2399   | 1576   | 3975   |
| R=Refusal and break off                                         | 35433  | 5597   | 41030  |

|                                       | Urban | Rural | All   |
|---------------------------------------|-------|-------|-------|
| NC=non-Contact                        | 5883  | 2432  | 8315  |
| O=Other                               | 11753 | 5754  | 17507 |
| <b>Response Rate</b>                  |       |       |       |
| <b>Response Rate 1</b>                |       |       |       |
| $I/(I+P) + (R+NC+O) + (UH+UO)$        | 0.870 | 0.956 | 0.909 |
| <b>Response Rate 2</b>                |       |       |       |
| $(I+P)/(I+P) + (R+NC+O) + (UH+UO)$    | 0.876 | 0.961 | 0.914 |
| <b>Response Rate 3</b>                |       |       |       |
| $I/((I+P) + (R+NC+O) + e(UH+UO) )$    | 0.870 | 0.956 | 0.909 |
| <b>Response Rate 4</b>                |       |       |       |
| $(I+P)/((I+P) + (R+NC+O) + e(UH+UO))$ | 0.876 | 0.961 | 0.914 |
| <b>Cooperation Rate</b>               |       |       |       |
| <b>Cooperation Rate 1</b>             |       |       |       |
| $I/(I+P) +R+O)$                       | 0.883 | 0.963 | 0.919 |
| <b>Cooperation Rate 2</b>             |       |       |       |
| $(I+P)/((I+P) +R+O))$                 | 0.888 | 0.967 | 0.924 |
| <b>Cooperation Rate 3</b>             |       |       |       |
| $I/((I+P) +R))$                       | 0.908 | 0.979 | 0.940 |
| <b>Cooperation Rate 4</b>             |       |       |       |



|                                           | Urban | Rural | All   |
|-------------------------------------------|-------|-------|-------|
| $(I+P)/((I+P) + R)$                       | 0.914 | 0.984 | 0.945 |
| <b>Refusal Rate</b>                       |       |       |       |
| <b>Refusal Rate 1</b>                     |       |       |       |
| $R/((I+P) + (R+NC+O) + UH + UO)$          | 0.083 | 0.016 | 0.053 |
| <b>Refusal Rate 2</b>                     |       |       |       |
| $R/((I+P) + (R+NC+O) + e(UH + UO))$       | 0.083 | 0.016 | 0.053 |
| <b>Refusal Rate 3</b>                     |       |       |       |
| $R/((I+P) + (R+NC+O))$                    | 0.083 | 0.016 | 0.053 |
| <b>Contact Rate</b>                       |       |       |       |
| <b>Contact Rate 1</b>                     |       |       |       |
| $(I+P) + R+O / (I+P) + R+O+NC+ (UH + UO)$ | 0.986 | 0.993 | 0.989 |
| <b>Contact Rate 2</b>                     |       |       |       |
| $(I+P) + R+O / (I+P) + R+O+NC + e(UH+UO)$ | 0.986 | 0.993 | 0.989 |
| <b>Contact Rate 3</b>                     |       |       |       |
| $(I+P) + R+O / (I+P) + R+O+NC$            | 0.986 | 0.993 | 0.989 |

**eTable 3.** Characteristics of the All Participants and Stroke Participants Stratified by Sex in 2020

| Characteristics                   | All Participants |              |              |        | Stroke Participants |             |             |        |
|-----------------------------------|------------------|--------------|--------------|--------|---------------------|-------------|-------------|--------|
|                                   | Total            | Men          | Women        | P      | Total               | Men         | Women       | P      |
| N, %                              | 676394(100.0)    | 281272(41.6) | 395122(58.4) | -      | 22974(100.0)        | 11302(49.2) | 11672(50.8) | -      |
| Mean age (SD), years              | 59.7(11)         | 60.1(11.2)   | 59.5(10.9)   | <.0001 | 66.9(9.0)           | 66.8(9.2)   | 67.0(8.7)   | <.0001 |
| BMI, mean (SD), kg/m <sup>2</sup> | 24.5(3.5)        | 24.6(3.4)    | 24.4(3.6)    | <.0001 | 25.2(3.7)           | 25.1(3.5)   | 25.3(3.8)   | <.0001 |
| BMI groups, Kg/m <sup>2</sup>     |                  |              |              |        |                     |             |             |        |
| <18.5                             | 13848(2.1)       | 5159(1.8)    | 8689(2.2)    | <.0001 | 411(1.8)            | 197(1.7)    | 214(1.8)    | <.0001 |
| 18.5-23.9                         | 306626(45.3)     | 121433(43.2) | 185193(46.9) |        | 8366(36.4)          | 4077(36.1)  | 4289(36.7)  |        |
| 24.0-27.9                         | 267681(39.6)     | 118944(42.3) | 148737(37.6) |        | 9898(43.1)          | 5089(45)    | 4809(41.2)  |        |
| >=28.0                            | 88239(13.1)      | 35736(12.7)  | 52503(13.3)  |        | 4299(18.7)          | 1939(17.2)  | 2360(20.2)  |        |
| WC, mean (SD), cm                 | 83.7(9.3)        | 86(9.2)      | 82.1(9.1)    | <.0001 | 86.6(9.8)           | 88.2(9.5)   | 85.1(9.8)   | <.0001 |
| Education                         |                  |              |              |        |                     |             |             |        |
| Primary school or lower           | 258877(38.3)     | 91120(32.4)  | 167757(42.5) | <.0001 | 10858(47.3)         | 4332(38.3)  | 6526(55.9)  | <.0001 |
| Junior high school                | 251960(37.3)     | 111734(39.7) | 140226(35.5) |        | 7746(33.7)          | 4383(38.8)  | 3363(28.8)  |        |
| High school                       | 108139(16)       | 49454(17.6)  | 58685(14.9)  |        | 3150(13.7)          | 1771(15.7)  | 1379(11.8)  |        |
| College and above                 | 57408(8.5)       | 28961(10.3)  | 28447(7.2)   |        | 1220(5.3)           | 816(7.2)    | 404(3.5)    |        |
| Annual income, CNY                |                  |              |              |        |                     |             |             |        |
| 0-5000                            | 170610(25.3)     | 58169(20.7)  | 112441(28.5) | <.0001 | 8190(35.7)          | 3403(30.2)  | 4787(41.1)  | <.0001 |
| 5000-10000                        | 99650(14.8)      | 39893(14.2)  | 59757(15.1)  |        | 3268(14.3)          | 1622(14.4)  | 1646(14.1)  |        |
| 10000-20000                       | 103317(15.3)     | 42378(15.1)  | 60939(15.4)  |        | 3042(13.3)          | 1473(13.1)  | 1569(13.5)  |        |
| >20000                            | 301858(44.7)     | 140395(50.0) | 161463(40.9) |        | 8439(36.8)          | 4780(42.4)  | 3659(31.4)  |        |
| 7 Geographical Regions            |                  |              |              |        |                     |             |             |        |
| North                             | 101096(15.0)     | 41638(14.8)  | 59458(15.0)  | <.0001 | 3747(16.3)          | 1934(17.1)  | 1813(15.5)  | .005   |
| Northeast                         | 57672(8.5)       | 23860(8.5)   | 33812(8.6)   |        | 2982(13)            | 1406(12.4)  | 1576(13.5)  |        |
| East                              | 203041(30)       | 85430(30.4)  | 117611(29.8) |        | 6470(28.2)          | 3226(28.5)  | 3244(27.8)  |        |
| Central                           | 127778(18.9)     | 52263(18.6)  | 75515(19.1)  |        | 4707(20.5)          | 2287(20.2)  | 2420(20.7)  |        |
| South                             | 51602(7.6)       | 20689(7.4)   | 30913(7.8)   |        | 1226(5.3)           | 598(5.3)    | 628(5.4)    |        |
| Southwest                         | 85713(12.7)      | 35580(12.6)  | 50133(12.7)  |        | 2035(8.9)           | 964(8.5)    | 1071(9.2)   |        |

| Characteristics          | All Participants |              |              |        | Stroke Participants |             |             |        |
|--------------------------|------------------|--------------|--------------|--------|---------------------|-------------|-------------|--------|
|                          | Total            | Men          | Women        | P      | Total               | Men         | Women       | P      |
| Northwest                | 49492(7.3)       | 21812(7.8)   | 27680(7.0)   |        | 1807(7.9)           | 887(7.8)    | 920(7.9)    |        |
| Economic level           |                  |              |              |        |                     |             |             |        |
| Undeveloped              | 73608(10.9)      | 30995(11)    | 42613(10.8)  | .0003  | 2222(9.7)           | 1052(9.3)   | 1170(10)    | .023   |
| Intermediately           | 129157(19.1)     | 53221(18.9)  | 75936(19.2)  |        | 4467(19.4)          | 2267(20.1)  | 2200(18.8)  |        |
| Developed                | 473629(70)       | 197056(70.1) | 276573(70)   |        | 16285(70.9)         | 7983(70.6)  | 8302(71.1)  |        |
| Risk factors             |                  |              |              |        |                     |             |             |        |
| Obesity <sup>††</sup>    |                  |              |              |        |                     |             |             |        |
| BMI                      | 88239(13.1)      | 35736(12.7)  | 52503(13.3)  | <.0001 | 4299(18.7)          | 1939(17.2)  | 2360(20.2)  | <.0001 |
| WC                       | 236964(35)       | 91933(32.7)  | 145031(36.7) | <.0001 | 10797(47)           | 4852(42.9)  | 5945(50.9)  | <.0001 |
| TIA                      | 5672(0.8)        | 2211(0.8)    | 3461(0.9)    | <.0001 | 306(1.3)            | 136(1.2)    | 170(1.5)    | .0943  |
| Smoking                  | 89089(13.2)      | 83686(29.8)  | 5403(1.4)    | <.0001 | 3702(16.1)          | 3414(30.2)  | 288(2.5)    | <.0001 |
| Drinking                 | 107052(15.8)     | 90134(32.0)  | 16918(4.3)   | <.0001 | 3644(15.9)          | 3262(28.9)  | 382(3.3)    | <.0001 |
| Atrial fibrillation      | 4328(0.6)        | 1984(0.7)    | 2344(0.6)    | <.0001 | 545(2.4)            | 297(2.6)    | 248(2.1)    | .0122  |
| Physical inactivity      | 161705(23.9)     | 66715(23.7)  | 94990(24.0)  | .0022  | 6752(29.4)          | 3267(28.9)  | 3485(29.9)  | .1135  |
| Family history of stroke | 68025(10.1)      | 27099(9.6)   | 40926(10.4)  | <.0001 | 5519(24)            | 2606(23.1)  | 2913(25.0)  | .0008  |
| History of heart disease | 33712(5)         | 13346(4.7)   | 20366(5.2)   | <.0001 | 4640(20.2)          | 1934(17.1)  | 2706(23.2)  | <.0001 |
| History of stroke        |                  |              |              |        |                     |             |             |        |
| IS                       | 20276(3.0)       | 9862(3.5)    | 10414(2.6)   | <.0001 | 20276(88.3)         | 9862(87.3)  | 10414(89.2) | <.0001 |
| ICH                      | 2782(0.4)        | 1500(0.5)    | 1282(0.3)    | .10    | 2782(12.1)          | 1500(13.3)  | 1282(11)    | <.0001 |
| SAH                      | 319(0.05)        | 153(0.1)     | 166(0.04)    | .021   | 319(1.39)           | 153(1.4)    | 166(1.42)   | .66    |
| Laboratory test          |                  |              |              |        |                     |             |             |        |
| SBP, mm Hg               | 132.8(17.9)      | 133.5(17.1)  | 132.4(18.4)  | <.0001 | 141.3(19.7)         | 140.9(19.2) | 141.7(20.1) | .16    |
| DBP, mm Hg               | 81(99.1)         | 82.1(10.7)   | 80.1(129.4)  | <.0001 | 83.4(11.4)          | 84.4(11.6)  | 82.4(11.2)  | <.0001 |
| TC, mmol/l               | 4.6(1.1)         | 4.4(1.1)     | 4.8(1.1)     | <.0001 | 4.5(1.2)            | 4.3(1.1)    | 4.8(1.2)    | <.0001 |
| HDL, mmol/l              | 1.5(0.6)         | 1.4(0.6)     | 1.5(0.5)     | <.0001 | 1.4(0.5)            | 1.3(0.5)    | 1.5(0.4)    | <.0001 |
| FPG, mmol/l              | 5.3(8.2)         | 5.3(12.6)    | 5.3(1.6)     | <.0001 | 5.7(1.9)            | 5.6(1.9)    | 5.8(2)      | <.0001 |
| Homocysteine, umol/l     | 14.6(9.4)        | 16.4(11.1)   | 13.2(7.8)    | <.0001 | 17.0(10.8)          | 19.1(12.4)  | 14.9(8.6)   | <.0001 |

| Characteristics       | All Participants |              |              |        | Stroke Participants |            |            |        |
|-----------------------|------------------|--------------|--------------|--------|---------------------|------------|------------|--------|
|                       | Total            | Men          | Women        | P      | Total               | Men        | Women      | P      |
| <b>Hypertension</b>   |                  |              |              |        |                     |            |            |        |
| Prevalence            | 302676(44.8)     | 129752(46.1) | 172924(43.8) | <.0001 | 18594(80.9)         | 9171(81.1) | 9423(80.7) | .42    |
| Awareness rate        | 181324(59.9)     | 76634(59.1)  | 104690(60.5) | <.0001 | 15862(85.3)         | 7775(84.8) | 8087(85.8) | .044   |
| Treatment rate        | 152467(50.4)     | 63316(48.8)  | 89151(51.6)  | <.0001 | 14353(77.2)         | 6972(76.0) | 7381(78.3) | .0006  |
| Control rate          | 84213(27.8)      | 35714(27.5)  | 48499(28.0)  | .0016  | 6445(34.7)          | 3200(34.9) | 3245(34.4) | .51    |
| <b>Diabetes</b>       |                  |              |              |        |                     |            |            |        |
| Prevalence            | 143331(21.2)     | 59948(21.3)  | 83383(21.1)  | .037   | 7987(34.8)          | 3717(32.9) | 4270(36.6) | <.0001 |
| Awareness rate        | 61633(43)        | 25939(43.3)  | 35694(42.8)  | .082   | 5445(68.2)          | 2471(66.5) | 2974(69.6) | .0024  |
| Treatment rate        | 49673(34.7)      | 20814(34.7)  | 28859(34.6)  | .058   | 4627(57.9)          | 2108(56.7) | 2519(59)   | .53    |
| Control rate          | 89237(62.3)      | 37722(62.9)  | 51515(61.8)  | <.0001 | 4644(58.1)          | 2229(60.0) | 2415(56.6) | .0017  |
| <b>Hyperlipidemia</b> |                  |              |              |        |                     |            |            |        |
| Prevalence            | 252307(37.3)     | 107307(38.2) | 145000(36.7) | <.0001 | 11981(52.2)         | 5709(50.5) | 6272(53.7) | <.0001 |
| Awareness rate        | 86163(34.2)      | 34024(31.7)  | 52139(36)    | <.0001 | 7084(59.1)          | 3147(55.1) | 3937(62.8) | <.0001 |
| Treatment rate        | 26762(10.6)      | 10177(9.5)   | 16585(11.4)  | <.0001 | 3707(30.9)          | 1637(28.7) | 2070(33)   | .64    |
| Control rate          | 49302(19.5)      | 18676(17.4)  | 30626(21.1)  | <.0001 | 4087(34.1)          | 1775(31.1) | 2312(36.9) | <.0001 |

†The results were presented as n(percentages) for categorical variables and as mean (Standard deviation, SD) for continuous variables

†† Current Chinese criteria define general obesity as a BMI of 28 kg/m<sup>2</sup> or higher and abdominal obesity as a WC of at least 90 cm for men and at least 85 cm for women

BMI, body mass index; WC, Waist circumference; CNY, Chinese Yuan; SBP, Systolic blood pressure; DBP, Diastolic blood pressure; FPG, fasting plasma glucose; TC, Total cholesterol; IS, ischemic stroke; ICH, intracerebral hemorrhage; SAH, Subarachnoid hemorrhage; TIA, Transient ischemic attack.

†††Prevalence=the number of diseases / the total number of participants \* 100%; Awareness rate= Number of patients who knew they had the disease/total number of patients\*100%; Treatment rate= Number of patients taking treatment /total number of patients\*100%; Control rate= The number of patients who reach the clinical control standard / the total number of patients \* 100%.

**eTable 4.** Characteristics of the All Participants and Stroke Participants Stratified by Locality in 2020

| Characteristics       | All participants |               |               |        | Stroke Participants |             |             |        |
|-----------------------|------------------|---------------|---------------|--------|---------------------|-------------|-------------|--------|
|                       | All              | Urban         | Rural         | P      | All                 | Urban       | Rural       | P      |
| Total                 | 676,394(100.0)   | 350,824(51.9) | 325,570(48.1) | –      | 22974(100.0)        | 12477(54.3) | 10497(45.7) | -      |
| Male                  | 281,272(41.6)    | 144,638(41.2) | 136,634(42.0) | <.0001 | 11302(100.0)        | 6138(49.2)  | 5164(49.2)  | 0.99   |
| Female                | 395,122(58.4)    | 206,186(58.8) | 188,936(58.0) | <.0001 | 11672(100.0)        | 6339(50.8)  | 5333(50.8)  | 0.99   |
| Mean age (SD), years  | 59.7(11.0)       | 59.7(10.9)    | 59.8(11.1)    | <.0001 | 66.9(9.0)           | 67.1(8.9)   | 66.6(9.1)   | .0006  |
| Age Group, years      |                  |               |               |        |                     |             |             | .0002  |
| 40-49                 | 143,135(21.2)    | 74,865(21.3)  | 68,270(21.0)  | <.0001 | 697(3.0)            | 329(2.6)    | 368(3.5)    |        |
| 50-59                 | 206,193(30.5)    | 105,229(30.0) | 100,964(31.0) |        | 4122(17.9)          | 2157(17.3)  | 1965(18.7)  |        |
| 60-69                 | 190,424(28.2)    | 102,232(29.1) | 88,192(27.1)  |        | 9035(39.3)          | 4956(39.8)  | 4079(38.8)  |        |
| 70-79                 | 107,513(15.9)    | 54,275(15.5)  | 53,238(16.4)  |        | 7344(32.0)          | 3979(31.9)  | 3365(32.0)  |        |
| 80+                   | 29,129(4.3)      | 14,626(4.2)   | 14,503(4.5)   |        | 1776(7.7)           | 1039(8.3)   | 737(7.0)    |        |
| Education             |                  |               |               |        |                     |             |             |        |
| High school or less   | 618,976(91.5)    | 303,844(86.6) | 315,132(96.8) | <.0001 | 21754(94.7)         | 11386(91.3) | 10368(98.8) | <.0001 |
| College/undergraduate | 56,032(8.3)      | 45,751(13.0)  | 10,281(3.2)   |        | 1206(5.2)           | 1078(8.6)   | 128(1.2)    |        |
| Postgraduate          | 1,376(0.2)       | 1,219(0.3)    | 157(0.05)     |        | 14(0.1)             | 13(0.1)     | 1(0.01)     |        |
| Annual income, RMB    |                  |               |               |        |                     |             |             |        |
| ≤ 10000               | 270,260(40.1)    | 83,872(23.9)  | 186,388(57.4) | <.0001 | 11458(50.0)         | 3891(31.3)  | 7567(72.1)  | <.0001 |
| >10000                | 406,134(59.9)    | 266,952(76.1) | 139,182(42.6) |        | 11516(50.0)         | 8586(68.7)  | 2930(27.9)  |        |
| Geographical Regions  |                  |               |               |        |                     |             |             |        |
| North                 | 101,096(15.0)    | 47,659(13.6)  | 53,437(16.4)  | <.0001 | 3747(16.3)          | 1628(13.0)  | 2119(17.0)  | <.0001 |
| Northeast             | 57,672(8.5)      | 32,290(9.2)   | 25,382(7.8)   |        | 2982(13.0)          | 1740(13.9)  | 1242(10.0)  |        |
| East                  | 203,041(30.0)    | 110,633(31.5) | 92,408(28.4)  |        | 6470(28.2)          | 3623(29.0)  | 2847(22.8)  | <.0001 |
| Central               | 127,778(18.9)    | 62,823(17.9)  | 64,955(20.0)  |        | 4707(20.5)          | 2652(21.3)  | 2055(16.5)  |        |
| South                 | 51,602(7.6)      | 32,443(9.2)   | 19,159(5.9)   |        | 1226(5.3)           | 897(7.2)    | 329(2.6)    |        |
| Southwest             | 85,713(12.7)     | 46,006(13.1)  | 39,707(12.2)  |        | 2035(8.9)           | 1202(9.6)   | 833(6.7)    | <.0001 |
| Northwest             | 49,492(7.3)      | 18,970(5.4)   | 30,522(9.4)   |        | 1807(7.9)           | 735(5.9)    | 1072(8.6)   | <.0001 |
| Economic level††      |                  |               |               |        |                     |             |             |        |

| Characteristics               | All participants |               |               |        | Stroke Participants |             |            |        |
|-------------------------------|------------------|---------------|---------------|--------|---------------------|-------------|------------|--------|
|                               | All              | Urban         | Rural         | P      | All                 | Urban       | Rural      | P      |
| Undeveloped                   | 73,608(10.9)     | 49,232(14.0)  | 24,376(7.5)   | <.0001 | 2222(9.7)           | 1553(12.4)  | 669(5.4)   | <.0001 |
| Intermediately                | 129,157(19.1)    | 68,305(19.5)  | 60,852(18.7)  |        | 4467(19.4)          | 2405(19.3)  | 2062(16.5) |        |
| Developed                     | 473,629(70.0)    | 233,287(66.5) | 240,342(73.8) |        | 16285(70.9)         | 8519(68.3)  | 7766(62.2) |        |
| <b>Behavioral factors</b>     |                  |               |               |        |                     |             |            |        |
| Smoking                       | 89,089(13.2)     | 39,985(11.4)  | 49,104(15.1)  | <.0001 | 3702(16.1)          | 1850(14.8)  | 1852(14.8) | <.0001 |
| Drinking                      | 107,052(15.8)    | 54,697(15.6)  | 52,355(16.1)  | <.0001 | 3644(15.9)          | 2097(16.8)  | 1547(12.4) | <.0001 |
| Physical inactivity††††       | 161,705(23.9)    | 76,910(21.9)  | 84,795(26.0)  | <.0001 | 6752(29.4)          | 3453(27.7)  | 3299(26.4) | <.0001 |
| <b>Weight status</b>          |                  |               |               |        |                     |             |            |        |
| BMI groups, kg/m <sup>2</sup> |                  |               |               |        |                     |             |            |        |
| <18.5                         | 13,848(2.1)      | 6,062(1.7)    | 7,786(2.4)    | <.0001 | 411(1.8)            | 171(1.4)    | 240(1.9)   | <.0001 |
| 18.5-23.9                     | 306,626(45.3)    | 156,910(44.7) | 149,716(46.0) |        | 8366(36.4)          | 4520(36.2)  | 3846(30.8) |        |
| 24.0-27.9                     | 267,681(39.6)    | 142,730(40.7) | 124,951(38.4) |        | 9898(43.1)          | 5483(43.9)  | 4415(35.4) |        |
| ≥28.0                         | 88,239(13.1)     | 45,122(12.9)  | 43,117(13.2)  |        | 4299(18.7)          | 2303(18.5)  | 1996(16.0) |        |
| <b>Underlying disease</b>     |                  |               |               |        |                     |             |            |        |
| History of stroke             |                  |               |               |        |                     |             |            |        |
| IS                            | 20,276(3.0)      | 11,115(3.2)   | 9,161(2.8)    | <.0001 | 20276(88.3)         | 11115(89.1) | 9161(73.4) | <.0001 |
| ICH                           | 2,782(0.4)       | 1,400(0.4)    | 1,382(0.4)    | .10    | 2782(12.1)          | 1400(11.2)  | 1382(11.1) | <.0001 |
| SAH                           | 319(0.05)        | 200(0.1)      | 119(0.03)     | .0001  | 319(1.4)            | 200(1.6)    | 119(1.0)   | .0025  |
| TIA                           | 5,672(0.8)       | 3,058(0.9)    | 2,614(0.8)    | <.0001 | 306(1.3)            | 182(1.5)    | 124(1.0)   | <.0001 |
| Atrial fibrillation           | 4,328(0.6)       | 2,532(0.7)    | 1,796(0.6)    | <.0001 | 545(2.4)            | 345(2.8)    | 200(1.6)   | <.0001 |
| Family history of stroke      | 68,025(10.1)     | 37,891(10.8)  | 30,134(9.3)   | <.0001 | 5519(24.0)          | 3059(24.5)  | 2460(19.7) | .056   |
| History of heart disease      | 33,712(5.0)      | 19,293(5.5)   | 14,419(4.4)   | <.0001 | 4640(20.2)          | 2756(22.1)  | 1884(17.9) | <.0001 |
| Hypertension                  |                  |               |               |        |                     |             |            |        |
| Prevalence                    | 302,676(44.8)    | 155,724(44.4) | 146,952(45.1) | <.0001 | 18594(80.9)         | 9985(80.0)  | 8609(69.0) | .0001  |
| Awareness rate                | 181,324(59.9)    | 95,080(61.1)  | 86,244(58.7)  | <.0001 | 15862(85.3)         | 8533(85.5)  | 7329(85.1) | .53    |
| Treatment rate                | 152,467(50.4)    | 82,241(52.8)  | 70,226(47.8)  | <.0001 | 14353(77.2)         | 7760(77.7)  | 6593(76.6) | .035   |
| Control rate                  | 84,213(27.8)     | 46,741(30.0)  | 37,472(25.5)  | <.0001 | 6445(34.7)          | 3650(36.6)  | 2795(32.5) | <.0001 |

| Characteristics | All participants |               |               |        | Stroke Participants |            |            |        |
|-----------------|------------------|---------------|---------------|--------|---------------------|------------|------------|--------|
|                 | All              | Urban         | Rural         | P      | All                 | Urban      | Rural      | P      |
| Diabetes        |                  |               |               |        |                     |            |            |        |
| Prevalence      | 143,331(21.2)    | 78,877(22.5)  | 64,454(19.8)  | <.0001 | 7987(34.8)          | 4587(36.8) | 3400(27.3) | <.0001 |
| Awareness rate  | 61,633(43.0)     | 37,175(47.1)  | 24,458(37.9)  | <.0001 | 5445(68.2)          | 3304(72.0) | 2141(63.0) | <.0001 |
| Treatment rate  | 49,673(34.7)     | 30,680(38.9)  | 18,993(29.5)  | <.0001 | 4627(57.9)          | 2810(61.3) | 1817(53.4) | <.0001 |
| Control rate    | 89,237(62.3)     | 48,937(62.0)  | 40,300(62.5)  | <.0001 | 4644(58.1)          | 2716(59.2) | 1928(56.7) | .065   |
| Hyperlipidemia  |                  |               |               |        |                     |            |            |        |
| Prevalence      | 252,307(37.3)    | 136,329(38.9) | 115,978(35.6) | <.0001 | 11981(52.2)         | 6739(54.0) | 5242(42.0) | <.0001 |
| Awareness rate  | 86,163(34.2)     | 50,745(37.2)  | 35,418(30.5)  | <.0001 | 7084(59.1)          | 4241(62.9) | 2843(54.2) | <.0001 |
| Treatment rate  | 26,762(10.6)     | 17,288(12.7)  | 9,474(8.2)    | <.0001 | 3707(30.9)          | 2294(34.0) | 1413(27.0) | .0003  |
| Control rate    | 49,302(19.5)     | 28,475(20.9)  | 20,827(18.0)  | <.0001 | 4087(34.1)          | 2431(36.1) | 1656(31.6) | <.0001 |

†The results were presented as n (percentages) for categorical variables and as mean (Standard deviation, SD) for continuous variables.

††Please refer to the supplementary materials for the division of economic level of Chinese cities

†††Current Chinese criteria define general obesity as a BMI of 28 kg/m<sup>2</sup> or higher.

††††Physical inactivity was defined according to World Health Organization's recommendations standard (at least 150 min of moderate-intensity, or 75 min of vigorous-intensity physical activity per week, or any equivalent combination of the two).

††††† Prevalence=the number of diseases / the total number of participants \* 100%; Awareness rate= Number of patients who knew they had the disease/total number of patients\*100%; Treatment rate= Number of patients taking treatment /total number of patients\*100%; Control rate= The number of patients who reach the clinical control standard / the total number of patients \* 100%.

BMI, body mass index; WC, Waist circumference; CNY, Chinese Yuan; SBP, Systolic blood pressure; DBP, Diastolic blood pressure; FPG, fasting plasma glucose; TC, Total cholesterol; IS, ischaemic stroke; ICH, intracerebral haemorrhage; SAH, 0 haemorrhage; TIA, Transient ischaemic attack

**eTable 5.** Stroke Burden of Chinese Adults Aged 40 Years or Over by Sex in 2020

| Characteristics           | Participants | Prevalence, % |              | Incidence per 100 000 <sup>‡‡</sup> |                    |
|---------------------------|--------------|---------------|--------------|-------------------------------------|--------------------|
|                           |              | N             | Rate(95%CI)  | N                                   | Rate(95%CI)        |
| Overall                   | 676394       | 22974         | 2.6(2.6-2.6) | 2330                                | 274.5(255.6-288.4) |
| Body mass index           |              |               |              |                                     |                    |
| <18.5                     | 13848        | 411           | 2.5(2.3-2.8) | 53                                  | 355.9(256.6-455.1) |
| 18.5-23.9                 | 306626       | 8366          | 2.1(2.0-2.1) | 887                                 | 226.7(209.8-243.5) |
| 24.0-27.9                 | 267681       | 9898          | 2.9(2.8-2.9) | 1002                                | 303(282.2-323.9)   |
| ≥28.0                     | 88239        | 4299          | 3.8(3.6-3.9) | 388                                 | 349.9(310.9-388.9) |
| P Value                   | <.0001       |               |              | <.0001                              |                    |
| Education status          |              |               |              |                                     |                    |
| High school or less       | 618976       | 21754         | 2.7(2.7-2.8) | 2193                                | 285.8(272.5-299.1) |
| College and undergraduate | 56032        | 1206          | 1.3(1.2-1.4) | 131                                 | 178.5(143.5-213.4) |
| Postgraduate              | 1376         | 14            | 0.5(0.1-0.9) | 6                                   | 242.0(-17.9-502)   |
| P Value                   | <.0001       |               |              | <.0001                              |                    |
| Annual income, CNY        |              |               |              |                                     |                    |
| 0-10000                   | 270260       | 11458         | 3.6(3.5-3.6) | 1106                                | 350.9(328.6-373.2) |
| >10000                    | 405175       | 11481         | 2.0(1.9-2)   | 1224                                | 219.8(205.4-234.2) |
| P Value                   | <.0001       |               |              | <.0001                              |                    |
| Family history of stroke  |              |               |              |                                     |                    |
| No                        | 608369       | 17455         | 2.2(2.1-2.2) | 1882                                | 242.6(230.3-255)   |
| Yes                       | 68025        | 5519          | 6.7(6.5-6.9) | 448                                 | 577.7(520.7-634.6) |
| P Value                   | <.0001       |               |              | <.0001                              |                    |
| Smoking status            |              |               |              |                                     |                    |
| No                        | 587305       | 19272         | 2.5(2.5-2.6) | 1947                                | 264.3(251.2-277.5) |
| Yes                       | 89089        | 3702          | 3.0(2.9-3.1) | 383                                 | 331.2(293.5-369)   |
| P Value                   | <.0001       |               |              | <.0001                              |                    |
| Consumption of alcohol    |              |               |              |                                     |                    |



| Characteristics                         | Participants | Prevalence, % |                 | Incidence per 100 000 <sup>†‡</sup> |                      |
|-----------------------------------------|--------------|---------------|-----------------|-------------------------------------|----------------------|
|                                         |              | N             | Rate(95%CI)     | N                                   | Rate(95%CI)          |
| No                                      | 569342       | 19330         | 2.6(2.6-2.7)    | 1968                                | 282.6(268.8-296.4)   |
| Yes                                     | 107052       | 3644          | 2.4(2.4-2.5)    | 362                                 | 244.6(215-274.2)     |
| P Value                                 | 0.88         |               |                 | 0.68                                |                      |
| Hypertension                            |              |               |                 |                                     |                      |
| No                                      | 373718       | 4380          | 0.8(0.8-0.9)    | 570                                 | 113.5(102.7-124.3)   |
| Yes                                     | 302676       | 18594         | 5.3(5.3-5.4)    | 1760                                | 526.4(500.7-552.2)   |
| P Value                                 | <.0001       |               |                 | <.0001                              |                      |
| Diabetes                                |              |               |                 |                                     |                      |
| No                                      | 533063       | 14987         | 2.1(2.1-2.2)    | 1493                                | 221.5(208.9-234.2)   |
| Yes                                     | 143331       | 7987          | 4.6(4.5-4.7)    | 837                                 | 487.8(451.7-523.9)   |
| P Value                                 | <.0001       |               |                 | <.0001                              |                      |
| Hyperlipidemia                          |              |               |                 |                                     |                      |
| No                                      | 424087       | 10993         | 2.0(1.9-2.0)    | 1163                                | 216.4(202.4-230.4)   |
| Yes                                     | 252307       | 11981         | 3.7(3.6-3.8)    | 1167                                | 378.5(354.5-402.5)   |
| P Value                                 | <.0001       |               |                 | <.0001                              |                      |
| Obesity, BMI $\geq$ 28kg/m <sup>2</sup> |              |               |                 |                                     |                      |
| No                                      | 588155       | 18675         | 2.4(2.4-2.5)    | 1942                                | 263.9(250.8-277)     |
| Yes                                     | 88239        | 4299          | 3.8(3.6-3.9)    | 388                                 | 349.9(310.9-388.9)   |
| P Value                                 | <.0001       |               |                 | <.0001                              |                      |
| TIA                                     |              |               |                 |                                     |                      |
| No                                      | 670722       | 22668         | 2.6(2.6-2.6)    | 1864                                | 224.2(212.8-235.5)   |
| Yes                                     | 5672         | 306           | 4.9(4.3-5.4)    | 466                                 | 7932(7228.7-8635.4)  |
| P Value                                 | <.0001       |               |                 | <.0001                              |                      |
| Atrial fibrillation                     |              |               |                 |                                     |                      |
| No                                      | 672066       | 22429         | 2.6(2.5-2.6)    | 2287                                | 271.1(258.6-283.5)   |
| Yes                                     | 4328         | 545           | 11.6(10.6-12.5) | 43                                  | 1188.8(865.7-1511.9) |
| P Value                                 | <.0001       |               |                 | <.0001                              |                      |

| Characteristics                           | Participants | Prevalence, % |              | Incidence per 100 000‡‡ |                    |
|-------------------------------------------|--------------|---------------|--------------|-------------------------|--------------------|
|                                           |              | N             | Rate(95%CI)  | N                       | Rate(95%CI)        |
| Physical inactivity                       |              |               |              |                         |                    |
| No                                        | 514689       | 16222         | 2.4(2.4-2.4) | 1610                    | 253.8(240-267.6)   |
| Yes                                       | 161705       | 6752          | 3.2(3.1-3.3) | 720                     | 341.5(313.1-369.9) |
| P Value                                   | <.0001       |               | <.0001       |                         |                    |
| Hyperhomocysteinemia, HCY $\geq$ 15mmol/l |              |               |              |                         |                    |
| No                                        | 454704       | 12585         | 2.1(2-2.1)   | 1408                    | 240.8(226.6-255.1) |
| Yes                                       | 221685       | 10389         | 3.7(3.6-3.8) | 922                     | 337.4(313.3-361.6) |
| P Value                                   | <.0001       |               | <.0001       |                         |                    |

‡The results indicate the age-standardised and sex-standardised rates to China census population 2010.

‡‡ The results indicate the Nonfatal Stroke Incidence; Clinical information was not available for 2119 incident cases who had died in the survey.

BMI, body mass index; WC, Waist circumference; TIA, Transient ischemic attack; HCY, Homocysteine

**eTable 6.** The Prevalence and Nonfatal Stroke Incidence in Chinese Adults Aged 40 Years or Older in 2020

| Characters             | Prevalence, % |              | Incidence, 1/100000   |                       | Mortality, 1/100000   |                       |
|------------------------|---------------|--------------|-----------------------|-----------------------|-----------------------|-----------------------|
|                        | Men           | Women        | Men                   | Women                 | Men                   | Women                 |
| All                    | 2.9(2.9-3.0)  | 2.3(2.2-2.3) | 568.8(541.4-596.3)    | 440.9(420.4-461.4)    | 368.5(346.4-390.6)    | 318.0(300.7-335.5)    |
| Age Group, y           |               |              |                       |                       |                       |                       |
| 40-49                  | 0.7(0.6-0.7)  | 0.3(0.3-0.4) | 173.8(140.4-207.2)    | 102.5(80.8-124.0)     | 51.1(32.9-69.1)       | 10.8(3.8-17.8)        |
| 50-59                  | 2.7(2.6-2.8)  | 1.8(1.7-1.8) | 418.8(374.6-462.9)    | 268.3(239.7-296.8)    | 102.5(80.6-124.4)     | 36.4(25.9-47.0)       |
| 60-69                  | 5.3(5.2-5.5)  | 4.3(4.2-4.4) | 790.6(730.0-851.4)    | 538.0(495.0-581.0)    | 296.4(259.1-333.7)    | 131.0(109.7-152.2)    |
| 70-79                  | 7.7(7.5-8.0)  | 6.6(6.4-6.8) | 1553.6(1444.7-1662.1) | 1133.6(1049.8-1217.3) | 1031.2(942.4-1120.1)  | 610.4(438.7-672.0)    |
| 80-                    | 7.2(6.8-7.7)  | 5.2(4.9-5.5) | 2862.2(2598.2-2126.1) | 2668.8(2436.4-2900.9) | 5359.9(5008.1-5711.7) | 5011.0(4700.6-5321.4) |
| Residence              |               |              |                       |                       |                       |                       |
| Urban                  | 3.1(3.1-3.2)  | 2.3(2.2-2.4) | 535.5(498.4-573.1)    | 437.3(409.0-465.3)    | 325.8(296.7-355.0)    | 294.5(271.5-317.7)    |
| Rural                  | 2.8(2.7-2.9)  | 2.3(2.2-2.3) | 593.8(553.8-633.7)    | 443.9(414.1-473.9)    | 400.5(367.7-433.4)    | 337.3(311.3-363.4)    |
| Ethnic                 |               |              |                       |                       |                       |                       |
| Minority               | 2.6(2.3-2.8)  | 2.1(1.9-2.3) | 373.3(261.3-485.3)    | 290.1(206.3-374.0)    | 420.4(395.5-444.1)    | 360.4(330.5-386.5)    |
| Han                    | 3.0(2.9-3.0)  | 2.3(2.2-2.3) | 297.2(276.8-317.7)    | 249.1(233.3-264.9)    | 389.0(369.4-409.4)    | 315.2(299.5-336.0)    |
| 7 Geographical Regions |               |              |                       |                       |                       |                       |
| North                  | 3.7(3.5-3.9)  | 2.6(2.5-2.7) | 693.8(614.7-772.9)    | 482.1(426.7-537.6)    | 526.9(457.9-595.8)    | 442.3(389.2-495.3)    |
| Northeast              | 4.3(4.1-4.6)  | 3.5(3.3-3.7) | 781.1(670.4-892.1)    | 563.6(484.2-643.0)    | 408.5(328.2-488.8)    | 271.4(216.3-326.6)    |
| East                   | 2.7(2.6-2.8)  | 2.1(2.0-2.2) | 431.6(388.5-474.7)    | 367.4(333.2-401.5)    | 272.8(238.5-307.1)    | 271.7(242.4-301.1)    |
| Central                | 3.2(3.0-3.3)  | 2.4(2.3-2.5) | 624.1(557.4-690.8)    | 409.3(364.0-454.5)    | 302.7(256.2-349.2)    | 253.2(217.6-288.8)    |
| South                  | 2.1(1.9-2.3)  | 1.6(1.4-1.7) | 572.8(472.3-673.4)    | 473.2(397.7-548.8)    | 403.9(319.5-488.4)    | 339.9(270.4-397.4)    |
| Southwest              | 2.2(2.0-2.3)  | 1.8(1.7-1.9) | 659.4(575.7-743.1)    | 513.6(451.1-576.1)    | 571.2(493.3-649.0)    | 445.5(387.3-503.7)    |
| Northwest              | 2.9(2.6-3.1)  | 2.3(2.2-2.5) | 328.0(252.9-403.1)    | 426.6(350.3-502.9)    | 173.6(119.0-228.2)    | 262.3(202.5-322.2)    |

‡The results indicate the age-standardised and sex-standardised rates to China census population 2010

**eTable 7. Multivariable Adjusted Odds Ratios for Stroke**

| Variable                           | N     | %   | Stroke          |         | Ischemic stroke  |         | Hemorrhagic stroke |         |
|------------------------------------|-------|-----|-----------------|---------|------------------|---------|--------------------|---------|
|                                    |       |     | OR (95%CI)      | P Value | OR (95%CI)       | P Value | OR (95%CI)         | P Value |
| Overall                            | 22974 | 100 |                 |         |                  |         |                    |         |
| Age groups (Reference:40-<50)      | 701   | 3   |                 |         |                  |         |                    |         |
| 50-<60                             | 4138  | 18  | 2.96(2.73-3.21) | <.0001  | 3.28(2.99-3.6)   | <.0001  | 2.07(1.76-2.43)    | 0.2089  |
| 60-<70                             | 9041  | 39  | 5.62(5.20-6.09) | <.0001  | 6.64(6.07-7.27)  | <.0001  | 2.71(2.31-3.18)    | <.0001  |
| 70-<80                             | 7317  | 32  | 7.54(6.96-8.18) | <.0001  | 9.19(8.38-10.07) | <.0001  | 2.90(2.45-3.43)    | <.0001  |
| ≥80                                | 1777  | 8   | 7.29(6.66-7.99) | <.0001  | 8.82(7.96-9.77)  | <.0001  | 2.95(2.40-3.62)    | <.0001  |
| Sex (Ref: Female)                  | 11672 | 51  |                 | <.0001  |                  | <.0001  |                    | <.0001  |
| Male                               | 11302 | 49  | 1.43(1.39-1.47) |         | 1.40(1.36-1.45)  |         | 1.62(1.5-1.74)     |         |
| Residence (Ref: Rural)             | 10497 | 46  |                 | <.0001  |                  | <.0001  |                    | 0.0342  |
| Urban                              | 12477 | 54  | 1.24(1.21-1.28) |         | 1.27(1.23-1.32)  |         | 1.09(1.01-1.18)    |         |
| Regions (Ref: Eastern)†            | 6470  | 28  |                 |         |                  |         |                    |         |
| Northern                           | 3747  | 16  | 1.22(1.16-1.27) | <.0001  | 1.24(1.18-1.29)  | <.0001  | 1.06(0.94-1.19)    | 0.0059  |
| Northeast                          | 2982  | 13  | 1.80(1.72-1.89) | <.0001  | 1.84(1.75-1.93)  | <.0001  | 1.65(1.45-1.88)    | <.0001  |
| Central                            | 4707  | 20  | 1.12(1.08-1.17) | 0.1357  | 1.12(1.08-1.17)  | 0.0239  | 1.14(1.03-1.27)    | 0.1987  |
| Southern                           | 1226  | 5   | 0.85(0.80-0.90) | <.0001  | 0.80(0.75-0.86)  | <.0001  | 1.24(1.07-1.44)    | 0.5803  |
| Southwest                          | 2035  | 9   | 0.75(0.71-0.79) | <.0001  | 0.72(0.68-0.76)  | <.0001  | 1.02(0.90-1.16)    | 0.0017  |
| Northwest                          | 1807  | 8   | 1.21(1.15-1.28) | <.0001  | 1.19(1.12-1.26)  | 0.0001  | 1.42(1.23-1.63)    | 0.0025  |
| Economic level (Ref: Developed)††  | 6689  | 29  |                 |         |                  |         |                    |         |
| Undeveloped                        | 16285 | 71  | 1.05(1.02-1.09) | 0.0007  | 1.03(1.00-1.07)  | 0.0532  | 1.20(1.11-1.31)    | <.0001  |
| Education (Ref: Postgraduate)      | 1220  | 5   |                 |         |                  |         |                    |         |
| Undergraduate or less              | 21754 | 95  | 1.20(1.13-1.28) | <.0001  | 1.20(1.12-1.28)  | <.0001  | 1.23(1.05-1.45)    | 0.012   |
| Annual income (Ref: ≥100000)       | 11481 | 50  |                 |         |                  |         |                    |         |
| <10000                             | 11458 | 50  | 1.37(1.33-1.41) | <.0001  | 1.38(1.34-1.43)  | <.0001  | 1.31(1.21-1.42)    | <.0001  |
| Family history of stroke (Ref: No) | 17455 | 76  |                 |         |                  |         |                    |         |
| Yes                                | 5519  | 24  | 2.38(2.3-2.46)  | <.0001  | 2.36(2.27-2.44)  | <.0001  | 2.50(2.29-2.72)    | <.0001  |

| Variable                               | N     | %  | Stroke          |         | Ischemic stroke |         | Hemorrhagic stroke |         |
|----------------------------------------|-------|----|-----------------|---------|-----------------|---------|--------------------|---------|
|                                        |       |    | OR (95%CI)      | P Value | OR (95%CI)      | P Value | OR (95%CI)         | P Value |
| History of heart disease (Ref: No)     | 18334 | 80 |                 |         |                 |         |                    |         |
| Yes                                    | 4640  | 20 | 2.49(2.4-2.59)  | <.0001  | 2.58(2.48-2.68) | <.0001  | 1.86(1.67-2.08)    | <.0001  |
| Hypertension (Ref: No)                 | 4380  | 19 |                 |         |                 |         |                    |         |
| Yes                                    | 18594 | 81 | 3.20(3.09-3.32) | <.0001  | 3.07(2.96-3.18) | <.0001  | 4.34(3.93-4.79)    | <.0001  |
| Diabetes (Ref: No)                     | 14987 | 65 |                 |         |                 |         |                    |         |
| Yes                                    | 7987  | 35 | 1.44(1.4-1.48)  | <.0001  | 1.47(1.43-1.52) | <.0001  | 1.25(1.16-1.35)    | <.0001  |
| Dyslipidemia (Ref: No)                 | 10993 | 48 |                 |         |                 |         |                    |         |
| Yes                                    | 11981 | 52 | 1.39(1.35-1.43) | <.0001  | 1.42(1.38-1.46) | <.0001  | 1.24(1.15-1.33)    | <.0001  |
| Obesity (Ref: No)                      | 18675 | 81 |                 |         |                 |         |                    |         |
| Yes                                    | 4299  | 19 | 1.15(1.1-1.19)  | <.0001  | 1.15(1.11-1.2)  | <.0001  | 1.09(0.99-1.2)     | 0.0763  |
| Atrial fibrillation (Ref: No)          | 22429 | 98 |                 |         |                 |         |                    |         |
| Yes                                    | 545   | 2  | 1.19(1.08-1.31) | 0.0007  | 1.16(1.05-1.29) | 0.0044  | 1.39(1.07-1.81)    | 0.014   |
| Physical inactivity (Ref: No)          | 16222 | 71 |                 |         |                 |         |                    |         |
| Yes                                    | 6752  | 29 | 1.19(1.16-1.23) | <.0001  | 1.17(1.13-1.21) | <.0001  | 1.38(1.28-1.49)    | <.0001  |
| Hyperhomocysteinemia (Ref: No) †††     | 12585 | 55 |                 |         |                 |         |                    |         |
| Yes                                    | 10389 | 45 | 1.22(1.19-1.25) | <.0001  | 1.20(1.16-1.24) | <.0001  | 1.39(1.29-1.49)    | <.0001  |
| Insufficient Vegetable/fruit (Ref: No) | 15714 | 68 |                 |         |                 |         |                    |         |
| Yes                                    | 7260  | 32 | 1.13(1.09-1.16) | <.0001  | 1.14(1.11-1.18) | <.0001  | 1.01(0.93-1.09)    | 0.8464  |

†7 Geographical Regions of China included North China (Beijing, Tianjin, Hebei, Shanxi, Inner Mongolia), Northeast China (Liaoning, Jilin, Heilongjiang), East China (Shanghai, Jiangsu, Zhejiang, Anhui, Fujian, Jiang xi, Shandong), South China (Guangdong, Guangxi, Hainan), Central China (Henan, Hubei, Hunan), Southwest China (Chongqing, Sichuan, Guizhou, Yunnan, Tibet), Northwest China (Shaanxi, Gansu, Qinghai, Ningxia, Xinjiang).

†† Please refer to the supplementary material II for the division of economic level of cities.

†††Hyperhomocysteinemia was defined as serum homocysteine concentration greater than or equal to 15.0umol/l
